# Supplementary material
Source: Research Square preprint supplement (doi:10.21203/rs.3.rs-9771359/v1)
Supplement: Supplementary file 1 [file 427d46ad50a0ede7b55124d0.xlsx]

## Sheet: Sheet1
Table S1 Origins, MTA45 haplotypes, and MTA81 haplotypes of 314 wheat accessions
ID	Name	Origin	Decade	Continent	MTA45	MTA81
N001	Gaoyuan 182	Qinghai, China	1960s	Asia	A	C
N002	Changhuai 18	Shandong, China	1970s	Asia	C	N
N003	Chuanmai 8	Sichuan, China	1970s	Asia	C	C
N004	Fengchan 3	Shanxi, China	1970s	Asia	C	A
N005	Humai 12	Qinghai, China	1980s	Asia	A	C
N006	Jichun 1016	Jilin, China	1980s	Asia	C	A
N007	Lumai 1	Shandong, China	1980s	Asia	C	Y
N008	Qingnong 469	Qinghai, China	1980s	Asia	C	A
N009	Xinzhe 9	Qinghai, China	1980s	Asia	A	C
N010	Yumai 7	Henan, China	1980s	Asia	C	A
N011	Zangchun 6	Tibet, China	1980s	Asia	A	Y
N012	Chuanmai 28	Sichuan, China	1990s	Asia	A	N
N013	Fengyou 1	Guizhou, China	1990s	Asia	M	A
N014	Ganchun 20	Gansu, China	1990s	Asia	C	A
N015	Gaoyuan 356	Qinghai, China	1990s	Asia	A	C
N016	Gaoyuan 465	Inner Mongolia, China	1990s	Asia	N	A
N017	Jinan 17	Shandong, China	1990s	Asia	C	A
N018	Jing 411	Beijing, China	1990s	Asia	A	A
N019	Laizhou 953	Shandong, China	1990s	Asia	A	A
N020	Lemai 5	Qinghai, China	1990s	Asia	A	A
N021	Lumai 14	Shandong, China	1990s	Asia	C	A
N022	Lumai 23	Shandong, China	1990s	Asia	C	C
N023	Luozhen 1	Henan, China	1990s	Asia	A	A
N024	Mianyang 28	Sichuan, China	1990s	Asia	A	C
N025	Minhe 588	Qinghai, China	1990s	Asia	A	C
N026	Minhe 853	Qinghai, China	1990s	Asia	A	C
N027	Ningchun 13	Ningxia, China	1990s	Asia	C	A
N028	Ningchun 26	Ningxia, China	1990s	Asia	M	A
N029	Qingchun 254	Qinghai, China	1990s	Asia	A	C
N030	Qingchun 415	Qinghai, China	1990s	Asia	A	A
N031	Qingchun 891	Qinghai, China	1990s	Asia	A	C
N032	Shi 4185	Hebei, China	1990s	Asia	A	C
N033	Xinong 2611	Shanxi, China	1990s	Asia	C	N
N034	Yumai 18	Henan, China	1990s	Asia	C	A
N035	Yumai 21	Henan, China	1990s	Asia	C	A
N036	Yumai 34	Henan, China	1990s	Asia	N	A
N037	Yumai 54	Henan, China	1990s	Asia	C	C
N038	Zhangchun 811	Qinghai, China	1990s	Asia	A	C
N039	Aikang 58	Henan, China	2000s	Asia	C	A
N040	Cangmai 028	Hebei, China	2000s	Asia	A	C
N041	Chuanmai 107	Sichuan, China	2000s	Asia	A	C
N042	Chuanmai 36	Sichuan, China	2000s	Asia	C	A
N043	Chuanmai 41	Sichuan, China	2000s	Asia	C	A
N044	Chuanmai 42	Sichuan, China	2000s	Asia	A	A
N045	Chuanmai 45	Sichuan, China	2000s	Asia	N	A
N046	Chuanmai 46	Sichuan, China	2000s	Asia	A	C
N047	Chuanmai 56	Sichuan, China	2000s	Asia	A	A
N048	Chuannong 12	Sichuan, China	2000s	Asia	N	C
N049	Chuannong 16	Sichuan, China	2000s	Asia	A	A
N050	Chuannong 17	Sichuan, China	2000s	Asia	N	N
N051	Chuannong 19	Sichuan, China	2000s	Asia	A	A
N052	Chuannong 21	Sichuan, China	2000s	Asia	A	A
N053	Chuanyu 16	Sichuan, China	2000s	Asia	A	A
N054	Chuanyu 17	Sichuan, China	2000s	Asia	A	A
N055	Chuanyu 19	Sichuan, China	2000s	Asia	A	A
N056	Chuanyu 20	Sichuan, China	2000s	Asia	A	A
N057	Chuanyu 21	Sichuan, China	2000s	Asia	A	A
N058	Chuanyu 23	Sichuan, China	2000s	Asia	A	A
N059	Chuanyu 24	Sichuan, China	2000s	Asia	A	A
N060	Gaoyuan 412	Qinghai, China	2000s	Asia	N	A
N061	Guinong 25	Guizhou, China	2000s	Asia	M	C
N062	Han 6172	Hebei, China	2000s	Asia	A	A
N063	Huaimai 22	Jiangsu, China	2000s	Asia	A	C
N064	Humai 13	Qinghai, China	2000s	Asia	C	A
N065	Humai 14	Qinghai, China	2000s	Asia	A	C
N066	Jimai 20	Shandong, China	2000s	Asia	C	A
N067	Jimai 21	Shandong, China	2000s	Asia	M	A
N068	Jimai 22	Shandong, China	2000s	Asia	A	C
N069	Kenong 9204	Hebei, China	2000s	Asia	M	A
N070	Liangxing 66	Shandong, China	2000s	Asia	A	C
N071	Liangxing 99	Shandong, China	2000s	Asia	A	C
N072	Liaomai 18	Shandong, China	2000s	Asia	N	A
N073	Linmai 4	Shandong, China	2000s	Asia	A	A
N074	Lumai 21	Jiangsu, China	2000s	Asia	A	A
N075	Luohan 6	Henan, China	2000s	Asia	A	A
N076	Luohan 7	Henan, China	2000s	Asia	A	A
N077	Luomai 21	Henan, China	2000s	Asia	N	A
N078	Luyuan 202	Shandong, China	2000s	Asia	C	A
N079	Luyuan 205	Shandong, China	2000s	Asia	M	C
N080	Mian 33	Sichuan, China	2000s	Asia	A	C
N081	Mian 37	Sichuan, China	2000s	Asia	A	C
N082	Mian 38	Sichuan, China	2000s	Asia	A	A
N083	Mianmai 45	Sichuan, China	2000s	Asia	A	A
N084	Minhe 665	Qinghai, China	2000s	Asia	N	A
N085	Qimai 1	Shandong, China	2000s	Asia	C	A
N086	Qingchun 587	Qinghai, China	2000s	Asia	A	C
N087	Qinnong 142	Shanxi, China	2000s	Asia	M	C
N088	Shannong 15	Shandong, China	2000s	Asia	C	A
N089	Shannong 17	Shandong, China	2000s	Asia	A	A
N090	Shixin 828	Hebei, China	2000s	Asia	M	C
N091	Taishan 21	Shandong, China	2000s	Asia	A	Y
N092	Taishan 22	Shandong, China	2000s	Asia	M	A
N093	Taishan 24	Shandong, China	2000s	Asia	A	A
N094	Tongmai 1	Qinghai, China	2000s	Asia	A	C
N095	Weimai 8	Shandong, China	2000s	Asia	A	A
N096	Wennong 5	Shandong, China	2000s	Asia	A	A
N097	Xiaoyan 22	Shanxi, China	2000s	Asia	C	A
N098	Xiaoyan 503	Shanxi, China	2000s	Asia	C	N
N099	Xiaoyan 81	Shanxi, China	2000s	Asia	C	A
N100	Xingmai 11	Hebei, China	2000s	Asia	C	C
N101	Xinmai 19	Henan, China	2000s	Asia	N	C
N102	Xinmai 289	Shandong, China	2000s	Asia	A	Y
N103	Xinong 2000	Shanxi, China	2000s	Asia	C	A
N104	Xinong 3517	Shanxi, China	2000s	Asia	C	C
N105	Xinong 889	Shanxi, China	2000s	Asia	C	C
N106	Xinong 979	Shanxi, China	2000s	Asia	C	C
N107	Xinong 9871	Shanxi, China	2000s	Asia	C	C
N108	Yangmai 13	Jiangsu, China	2000s	Asia	M	A
N109	Yangmai 14	Jiangsu, China	2000s	Asia	M	A
N110	Yangmai 15	Jiangsu, China	2000s	Asia	A	A
N111	Yangmai 17	Jiangsu, China	2000s	Asia	M	A
N112	Yannong 19	Shandong, China	2000s	Asia	C	A
N113	Yannong 22	Shandong, China	2000s	Asia	C	A
N114	Yannong 24	Shandong, China	2000s	Asia	A	A
N115	Yanzhan 1	Henan, China	2000s	Asia	C	C
N116	Yanzhan 4110	Henan, China	2000s	Asia	C	A
N117	Yumai 49	Henan, China	2000s	Asia	M	A
N118	Yunong 416	Henan, China	2000s	Asia	M	Y
N119	Zhengmai 366	Henan, China	2000s	Asia	N	A
N120	Zhengmai 9023	Henan, China	2000s	Asia	A	C
N121	Zhongyou 9507	Beijing, China	2000s	Asia	C	Y
N122	Zhoumai 18	Henan, China	2000s	Asia	C	A
N123	Zhoumai 22	Henan, China	2000s	Asia	C	A
N124	Zhoumai 27	Henan, China	2000s	Asia	N	A
N125	Zimai 12	Shandong, China	2000s	Asia	C	C
N126	Ankemai 1405	Anhui, China	2010s	Asia	C	C
N127	Annong 1124	Anhui, China	2010s	Asia	C	A
N128	Bainong 4199	Henan, China	2010s	Asia	C	A
N129	Chuanmai 104	Sichuan, China	2010s	Asia	A	A
N130	Chuanmai 58	Sichuan, China	2010s	Asia	A	C
N131	Denghai 206	Shandong, China	2010s	Asia	C	A
N132	Guixie 3	Guizhou, China	2010s	Asia	M	C
N133	Hemai 17	Shandong, China	2010s	Asia	A	A
N134	HengS 29	Hebei, China	2010s	Asia	C	C
N135	Jimai 181	Shandong, China	2010s	Asia	A	C
N136	Jimai 23	Shandong, China	2010s	Asia	A	C
N137	Jimai 262	Shandong, China	2010s	Asia	A	A
N138	Jimai 39	Hebei, China	2010s	Asia	A	A
N139	Kaimai 21	Henan, China	2010s	Asia	C	C
N140	KY088	Shandong, China	2010s	Asia	A	C
N141	Lankao 198	Henan, China	2010s	Asia	C	A
N142	Lunxuan 1690	Beijing, China	2010s	Asia	A	A
N143	Luomai 28	Henan, China	2010s	Asia	C	A
N144	Luomai 29	Henan, China	2010s	Asia	C	C
N145	Luomai 31	Henan, China	2010s	Asia	C	A
N146	Luyuan 502	Shandong, China	2010s	Asia	N	A
N147	Puxing 5	Henan, China	2010s	Asia	N	A
N148	Qingnong 6	Shandong, China	2010s	Asia	A	A
N149	Shannong 116	Shandong, China	2010s	Asia	N	C
N150	Shannong 22	Shandong, China	2010s	Asia	C	A
N151	Shannong 25	Shandong, China	2010s	Asia	C	A
N152	Shengmai 102	Shandong, China	2010s	Asia	A	C
N153	Shimai 25	Hebei, China	2010s	Asia	A	C
N154	Taikemai 30	Shandong, China	2010s	Asia	C	C
N155	Taikemai 31	Shandong, China	2010s	Asia	A	A
N156	Taikemai 33	Shandong, China	2010s	Asia	N	A
N157	Tainong 19	Shandong, China	2010s	Asia	A	Y
N158	Taishan 27	Shandong, China	2010s	Asia	C	C
N159	Taishan 28	Shandong, China	2010s	Asia	A	Y
N160	Tanmai 98	Shandong, China	2010s	Asia	C	A
N161	Xiaoyan 68	Shanxi, China	2010s	Asia	C	C
N162	Xingmai 13	Hebei, China	2010s	Asia	C	A
N163	Xinmai 23	Henan, China	2010s	Asia	M	A
N164	Xinmai 26	Henan, China	2010s	Asia	C	A
N165	Xinmai 296	Shandong, China	2010s	Asia	N	C
N166	Xinong 209	Shanxi, China	2010s	Asia	C	A
N167	Xumai 35	Jiangsu, China	2010s	Asia	N	A
N168	Yan 1212	Shandong, China	2010s	Asia	C	A
N169	Yannong 173	Shandong, China	2010s	Asia	A	C
N170	Yannong 999	Shandong, China	2010s	Asia	A	A
N171	Yaomai 16	Shanxi, China	2010s	Asia	A	A
N172	Zhongkemai 138	Sichuan, China	2010s	Asia	A	A
N173	Zhongkemai 47	Sichuan, China	2010s	Asia	A	A
N174	Zhongmai 1062	Beijing, China	2010s	Asia	N	A
N175	Zhongmai 175	Beijing, China	2010s	Asia	A	A
N176	Zhongmai 23	Beijing, China	2010s	Asia	C	C
N177	Zhongmai 415	Beijing, China	2010s	Asia	A	A
N178	Zhongmai 895	Beijing, China	2010s	Asia	C	A
N179	Zhongxin 8678	Hebei, China	2010s	Asia	A	A
N180	Zhongyou 629	Beijing, China	2010s	Asia	N	A
N181	Zhoumai 28	Henan, China	2010s	Asia	N	C
N182	Zhoumai 32	Henan, China	2010s	Asia	M	A
N183	Zimai 29	Shandong, China	2010s	Asia	A	A
N184	Huiyan 912	Anhui, China	2020s	Asia	A	A
N185	Lunxuan 149	Beijing, China	2020s	Asia	C	Y
N186	Baihuamai	Zhejiang, China	Landraces	Asia	C	N
N187	Baimaizi	Sichuan, China	Landraces	Asia	C	C
N188	Baiyoumai	Heilongjiang, China	Landraces	Asia	C	N
N189	Bendimai	Guizhou, China	Landraces	Asia	C	N
N190	Caijiangmai	Guizhou, China	Landraces	Asia	C	C
N191	Dazibai	Shanxi, China	Landraces	Asia	C	C
N192	Dingxingzhai	Shanxi, China	Landraces	Asia	C	N
N193	Fumai	Henan, China	Landraces	Asia	C	N
N194	Hongheshangtou	Anhui, China	Landraces	Asia	C	N
N195	Hongkeyoumang	Hunan, China	Landraces	Asia	A	C
N196	Hongxiuzi	China	Landraces	Asia	C	C
N197	Huajiechangbaican	Zhejiang, China	Landraces	Asia	C	A
N198	Huoqiu	Liaoning, China	Landraces	Asia	A	N
N199	Huxumai	Anhui, China	Landraces	Asia	C	C
N200	Jiangdongmen	Jiangsu, China	Landraces	Asia	A	N
N201	Jiangmai	Guizhou, China	Landraces	Asia	C	C
N202	Kangdingxiaomai	Sichuan, China	Landraces	Asia	C	C
N203	Qubaichun	Tibet, China	Landraces	Asia	N	A
N204	TIBET	Tibet, China	Landraces	Asia	A	A
N205	Xianyangdasui	Shanxi, China	Landraces	Asia	M	C
N206	Chinese Spring	Sichuan, China	Landraces	Asia	C	C
N207	Bailangmai	Tibet, China	NA	Asia	A	Y
N208	BFB10	Beijing, China	NA	Asia	A	A
N209	CA12108	Beijing, China	NA	Asia	N	A
N210	Guigu 328	Hebei, China	NA	Asia	A	A
N211	Guixie 12-1	Guizhou, China	NA	Asia	M	A
N212	Guixie 9-3	Guizhou, China	NA	Asia	M	A
N213	Hezuo 2	Heilongjiang, China	NA	Asia	C	A
N214	Jiachabangdadongmai 4	Tibet, China	NA	Asia	A	Y
N215	Jimai 37	Shandong, China	NA	Asia	A	C
N216	Jimai 631	Hebei, China	NA	Asia	C	C
N217	Liangxing 162	Shandong, China	NA	Asia	C	A
N218	Liangxing 517	Shandong, China	NA	Asia	A	C
N219	Liaomai 2	Shandong, China	NA	Asia	A	A
N220	Linmai 7	Shandong, China	NA	Asia	M	A
N221	Linmai 8	Shandong, China	NA	Asia	N	A
N222	Luyuan 158	Shandong, China	NA	Asia	C	A
N223	Luyuan 288	Shandong, China	NA	Asia	N	A
N224	Nei 2889	Inner Mongolia, China	NA	Asia	A	A
N225	Qidu 1	Shandong, China	NA	Asia	M	Y
N226	Ruiquanmai 168	Shanxi, China	NA	Asia	C	A
N227	Shan 157	Shanxi, China	NA	Asia	C	A
N228	Shan 538	Shanxi, China	NA	Asia	C	C
N229	Shannong 711	Shandong, China	NA	Asia	A	A
N230	Tainong 32	Shandong, China	NA	Asia	A	C
N231	Tiantaiyoumai 1	Shandong, China	NA	Asia	A	C
N232	Tiantaiyoumai 6	Shandong, China	NA	Asia	C	A
N233	Weimai 1917	Shandong, China	NA	Asia	M	Y
N234	Wennong 18	Shandong, China	NA	Asia	N	A
N235	Wennong 29	Shandong, China	NA	Asia	A	C
N236	Xiangnong 3	Qinghai, China	NA	Asia	A	C
N237	Xiaoshui 33	Shanxi, China	NA	Asia	C	C
N238	Xinyang 12	Henan, China	NA	Asia	C	C
N239	Younongmai 887	Hebei, China	NA	Asia	N	A
N240	Zhengmai 9201	Henan, China	NA	Asia	C	C
N241	Zhongmai 4079	Beijing, China	NA	Asia	A	A
N242	5467	Iran	NA	Asia	C	A
N243	AC Foremost	Canada	NA	North America	C	A
N244	AC Taber	Canada	NA	North America	C	A
N245	Acimital	Australia	NA	Oceania	C	C
N246	Ailiduo	Italy	NA	Europe	A	C
N247	ALSHVEDE	Denmark	NA	Europe	N	A
N248	AURORA	Russia	NA	Asia	C	N
N249	BH941	Brazil	NA	South America	C	C
N250	Biggar	Canada	NA	North America	C	A
N251	Bobwhite	Mexico	NA	North America	M	A
N252	Canberra	Australia	NA	Oceania	A	N
N253	celebration	Australia	NA	Oceania	C	A
N254	CMT-1011	Mexico	NA	North America	C	A
N255	CMT-1012	Mexico	NA	North America	C	A
N256	CMT-11	Mexico	NA	North America	C	A
N257	CMT-12	Mexico	NA	North America	C	A
N258	CMT-13	Mexico	NA	North America	C	A
N259	CMT-14	Mexico	NA	North America	C	A
N260	CMT-15	Mexico	NA	North America	C	A
N261	CMT-16	Mexico	NA	North America	C	A
N262	CMT-17	Mexico	NA	North America	C	A
N263	CMT-18	Mexico	NA	North America	C	A
N264	CMT-19	Mexico	NA	North America	C	A
N265	CMT-20	Mexico	NA	North America	C	A
N266	CMT-21	Mexico	NA	North America	C	A
N267	CMT-22	Mexico	NA	North America	C	N
N268	CMT-23	Mexico	NA	North America	C	A
N269	CMT-24	Mexico	NA	North America	C	A
N270	CMT-25	Mexico	NA	North America	C	A
N271	CMT-26	Mexico	NA	North America	C	A
N272	CMT-27	Mexico	NA	North America	C	A
N273	CMT-28	Mexico	NA	North America	C	A
N274	CMT-29	Mexico	NA	North America	C	A
N275	CMT-3	Mexico	NA	North America	C	A
N276	CMT-30	Mexico	NA	North America	C	A
N277	CMT-4	Mexico	NA	North America	C	A
N278	CMT-5	Mexico	NA	North America	C	A
N279	CMT-6	Mexico	NA	North America	C	A
N280	CMT-7	Mexico	NA	North America	C	A
N281	CMT-8	Mexico	NA	North America	C	A
N282	CMT-9	Mexico	NA	North America	C	A
N283	Darkan	Australia	NA	Oceania	A	A
N284	Duiker	SouthAfrica	NA	Africa	A	A
N285	Dundec	Australia	NA	Oceania	A	N
N286	FIFE	Poland	NA	Europe	C	N
N287	Freeman	America	NA	North America	A	A
N288	IRAGI	Iraq	NA	Asia	C	C
N289	Kuro	Kenya	NA	Africa	C	A
N290	Lleafen	Australia	NA	Oceania	A	C
N291	Magnif G	Argentina	NA	South America	A	N
N292	Mara	Italy	NA	Europe	C	N
N293	MIETI	Italy	NA	Europe	A	C
N294	Mingguangxiaomai	Japan	NA	Asia	C	A
N295	Minifen	Chile	NA	South America	A	A
N296	Mobo	Mexico	NA	North America	N	A
N297	Moyin 2	Mexico	NA	North America	C	Y
N298	PADUS	Italy	NA	Europe	C	C
N299	Penawa	Canada	NA	North America	C	A
N300	PI27701	America	NA	North America	C	C
N301	PNE209-1	Pakistan	NA	Asia	C	N
N302	PNE264-4	Pakistan	NA	Asia	C	C
N303	PNE394-2	Pakistan	NA	Asia	C	A
N304	Pronghor	America	NA	North America	A	A
N305	PSATHAS	Cyprus	NA	Asia	C	A
N306	RAMONA 65	America	NA	North America	C	A
N307	Rena	CzechRepublic	NA	Europe	A	N
N308	RIETI	Italy	NA	Europe	C	A
N309	Shuiyuan 86	Korea	NA	Asia	A	A
N310	Tito	Mexico	NA	North America	C	C
N311	Tosson	Egypt	NA	Africa	C	C
N312	uR8	Uruguay	NA	South America	C	C
N313	WHITEFEDERATION 60	America	NA	North America	C	A
N314	Zhengyin 1	Italy	NA	Europe	A	C

## Sheet: Sheet2
Table S2 The descriptive statistics and analysis of variance (ANOVA) of wheat quality traits.
Traits	Min	Max	Mean	SD	Skew	Kurt	CV(%)	H²
GPC	11.5054	17.8031	14.1806	1.14729	0.514973	-0.145988	8.09056	0.295776
TW	780.026	815.228	796.911	6.15018	-0.180632	-0.0574372	0.771752	0.424803
WGC	26.7457	40.5688	31.3942	2.01024	0.811888	1.45231	6.40323	0.300046
MC	9.61419	10.5816	10.0711	0.169699	0.104938	-0.0598577	1.68501	0.027455
WA	48.7936	64.4214	57.12	3.10929	-0.169437	-0.378471	5.44343	0.542449
DST	5.86111	9.96707	7.74577	0.761228	0.284476	-0.185586	9.82767	0.561045
DDT	2.46213	6.66697	3.98481	0.651037	0.558172	0.816973	16.338	0.557709
EXT	99.4199	171.537	126.2	10.1133	0.52152	1.34791	8.01373	0.187608
EA	63.267	135.05	95.1549	12.4252	0.462245	0.280447	13.0579	0.385003
Rmax	127.198	422.289	269.156	51.3702	0.241312	0.00824072	19.0856	0.550262
Min: minimum
Max: maximum
SD: standard deviation
CV: coefficient of variation
H2: broad-sense heritability
GPC: grain protein content, TW: test weight, WGC: wet gluten content, MC: moisture content, WA: water absorption, DST: dough stability time, DDT: dough development time, EXT: extensibility, EA: extension area, Rmax: maximum resistance.

## Sheet: Sheet3
Table S3 Major and stable MTAs for 10 quality traits identified by GWAS.
ID	Trait	MTAs	SNP	Chr	Chr	Pos	-LOG10P	Effect	EVN	Env_Num	Near QTL/locus Previously reported in the same chromosome
1	DST	MTA1	AX-110574960	1	1A	27176140	3.03;3.44	-0.38;-0.30	E2;E4	2	Excalibur_c23515_1177 (GPC)(Liu et al. 2017); q1A-1 (DDT)(Yang et al. 2020); MTA1 (SL)(Xu et al. 2024)
2	WGC	MTA2	AX-110999554	1	1A	31138218	3.52;3.07	-0.84;-0.49	E2;BLUE	2	QGpc.dms-1A.1 (Semagn et al. 2021); q1A-2 (DDT/DST/WGC)(Yang et al. 2020)
3	TW	MTA3	AX-111736828	1	1A	340636973	4.22;7.85	2.66;1.61	E3;BLUE	2	S1A_30190358 (TW)(Sallam et al. 2020)
4	DDT	MTA4	AX-110686891	1	1A	374640713	3.74;3.71	0.20;0.33	E1;E6	2
5	DDT	MTA5	AX-108831752	1	1A	376073983	3.34;3.48	0.18;0.32	E1;E6	2
6	TW	MTA6	AX-108774950	1	1A	397964562	3.28;3.19	3.57;3.76	E2;E6	2	MTA5 (SEL)(Xu et al. 2024)
7	EA	MTA7	AX-111572690	2	1B	22981758	3.45;3.67;8.44	8.39;7.24;6.89	E3;E4;BLUE	3	IAAV6424 (TW)(Aleliūnas et al. 2024)
8	Rmax	MTA8	AX-110408487	2	1B	329037085	6.39;3.06	-17.32;-22.02	E4;E5	2	S1B_333601451 (GPC)(Sallam et al. 2020); MTA18 (SL)(Xu et al. 2024)
9	DDT	MTA9	AX-111550166	2	1B	524741077	3.24;3.88	-0.20;-0.13	E2;BLUE	2
10	DDT	MTA10	AX-111548801	2	1B	674655933	4.34;4.72	0.12;0.12	E3;BLUE	2	MTA21 (SL), MTA21 (GN) (Xu et al. 2024)
11	WA	MTA11	AX-109290352	3	1D	20445969	3.09;3.37	1.08;1.47	E2;E3	2	QGpc.dms-1D (Semagn et al. 2021); Ku_c12842_664 (GPC)(Aleliūnas et al. 2024); MTA25-27 (SC)(Xu et al. 2024)
12	WA	MTA12	AX-111853381	3	1D	25161316	3.18;3.67	1.02;0.84	E4;BLUE	2	QGpc.dms-1D (Semagn et al. 2021); wsnp_Ex_c12012_19240904 (GPC)(Godoy et al. 2018); MTA25-27 (SC)(Xu et al. 2024)
13	DDT/Rmax	MTA13	AX-110466112	4	2A	40119320	6.98;6.57/3.16;3.25	-0.21;-0.13/-13.79;-7.78	E5;BLUE/E5;BLUE	2/2	Tdurum_contig12952_114 (GPC)(Liu et al. 2017); MTA39 (SEL)(Xu et al. 2024); Rht8/RNHL-A1 (Chai et al. 2022)
14	EA	MTA14	AX-108890992	5	2B	124668121	3.99;3.08	-5.71;-2.67	E5;BLUE	2
15	EA	MTA15	AX-111665206	5	2B	125069310	4.01;3.09	-5.59;-2.60	E5;BLUE	2
16	WA	MTA16	AX-110366150	5	2B	172387476	3.62;4.3	-1.52;-1.26	E4;BLUE	2	MTA56 (TKW)(Xu et al. 2024)
17	WA	MTA17	AX-110495015	5	2B	172515654	3.32;3.25	-0.74;-0.55	E4;BLUE	2	MTA56 (TKW)(Xu et al. 2024)
18	WA	MTA18	AX-108896991	5	2B	172849025	3.16;3.01	-0.72;-0.52	E4;BLUE	2	MTA56 (TKW)(Xu et al. 2024)
19	WA	MTA19	AX-111071301	5	2B	762245576	3.17;3.71	0.83;0.70	E4;BLUE	2	TaSOD-B2 (Wang et al. 2025)
20	WA	MTA20	AX-111656989	5	2B	803432931	3.01;3.21	-1.31;-0.72	E3;BLUE	2
21	DST	MTA21	AX-109330112	5	2B	811112828	3.83;3.14	0.39;0.21	E5;BLUE	2
22	WA	MTA22	AX-111154051	6	2D	30393267	3.21;3.27	2.30;1.74	E4;BLUE	2	MTA65 (TKW)(Xu et al. 2024)
23	WA	MTA23	AX-111088504	6	2D	63265867	3.02;3.24	0.98;0.79	E4;BLUE	2	MTA69 (SL)(Xu et al. 2024); TaARF12-2D (Li et al. 2022)
24	WA	MTA24	AX-111863591	6	2D	68267696	3.23;3.17	-0.84;-0.60	E2;BLUE	2
25	WA	MTA25	AX-111116868	6	2D	69216245	3.75;3.09;3.28	-0.94;-0.81;-0.63	E2;E4;BLUE	3
26	GPC	MTA26	AX-111540711	6	2D	139109773	3.32;3.33	-0.46;-0.23	E5;BLUE	2
27	TW	MTA27	AX-110982987	6	2D	145668717	3.33;3.46;8.86	4.12;4.57;3.55	E2;E4;BLUE	3
28	WGC	MTA28	AX-110422245	7	3A	159752335	3.1;3.29	0.96;0.62	E2;BLUE	2
29	MC	MTA29	AX-109439433	7	3A	265515687	6.9;3.22	-0.12;-0.06	E2;BLUE	2	QTwt.dms-3A.2 (Semagn et al. 2021)
30	WGC/GPC	MTA30	AX-109915920	7	3A	299325953	3.24;3.38/3.25;3.27	0.61;0.58/0.28;0.20	E1;E2/E2;BLUE	2/2
31	WGC	MTA31	AX-110130005	7	3A	346000098	3.49;3.18;3.17	0.64;0.54;0.33	E1;E2;BLUE	3
32	WGC	MTA32	AX-109401219	7	3A	376424636	4.07;3.02	0.71;0.55	E1;E2	2	QNGPC.cau-3A, QNWGC.cau-3A (Lou et al. 2021)
33	GPC	MTA33	AX-110969224	7	3A	379002618	3.31;3.42	0.28;0.20	E2;BLUE	2	QNGPC.cau-3A, QNWGC.cau-3A (Lou et al. 2021)
34	DDT	MTA34	AX-110512340	7	3A	384019980	3.31;3.03	-0.49;-0.36	E4;BLUE	2
35	GPC	MTA35	AX-108737998	7	3A	388357340	3.08;3.08	0.27;0.19	E2;BLUE	2
36	WGC	MTA36	AX-111231934	7	3A	429343495	3.45;3.33	0.65;0.39	E1;BLUE	2
37	GPC	MTA37	AX-109035608	7	3A	445615845	3.02;3.76	0.28;0.22	E2;BLUE	2
38	MC	MTA38	AX-111068094	7	3A	516864210	3.07;4.06	0.12;0.16	E1;E5	2
39	GPC	MTA39	AX-111103112	7	3A	524832816	3.14;3.1	-0.34;-0.18	E6;BLUE	2
40	DST	MTA40	AX-110441678	7	3A	654054606	4.62;5.78	-0.30;-0.17	E6;BLUE	2
41	WA	MTA41	AX-109933033	8	3B	26128982	4.38;3.02	-0.92;-0.57	E4;BLUE	2	QST.caas.3BS (Jin et al. 2016); a3B-2 (WA)(Yang et al. 2020)
42	WA	MTA42	AX-109445076	8	3B	26299187	3.18;3.27	-0.79;-0.62	E4;BLUE	2	QST.caas.3BS (Jin et al. 2016); a3B-2 (WA)(Yang et al. 2020)
43	WA	MTA43	AX-110505751	8	3B	26315405	4.03;4.61	-0.97;-0.80	E4;BLUE	2	QST.caas.3BS (Jin et al. 2016); a3B-2 (WA)(Yang et al. 2020)
44	WA	MTA44	AX-110393614	8	3B	26402622	3.87;4.36	-0.94;-0.76	E4;BLUE	2	QST.caas.3BS (Jin et al. 2016); a3B-2 (WA)(Yang et al. 2020)
45	DST	MTA45	AX-109989063	8	3B	52496521	3.43;4.03;3.1;4.24	0.24;0.22;0.27;0.15	E2;E5;E6;BLUE	4
46	EA	MTA46	AX-110920832	8	3B	55107690	3.01;3.52;3.39	6.97;6.19;3.26	E3;E4;BLUE	3
47	EXT	MTA47	AX-108948265	8	3B	236419716	3.64;3.5	-2.46;-2.05	E4;BLUE	2	MTA81 (TKW)(Xu et al. 2024)
48	EA	MTA48	AX-110055939	8	3B	464949680	3.45;3.4	9.51;-7.56	E1;E4	2	wsnp_Ex_c2580_4799370 (TW)(Godoy et al. 2018)
49	WA	MTA49	AX-110493720	8	3B	815727675	3.06;3.04	-0.80;-0.61	E4;BLUE	2	QGpc.dms-3B (Semagn et al. 2021)
50	WA	MTA50	AX-111807575	9	3D	525942969	3.39;3.12	0.74;0.61	E1;BLUE	2	QNWA.cau-3D.2 (Lou et al. 2021), Loci_S9_50810552 (GPC)(Battenfield et al. 2018); Ex_c52589_795 (GPC, WGC)(Gao et al. 2021); 949824 (WGC/GPC)(Alemu et al. 2021)
51	WA	MTA51	AX-94748732	9	3D	572165514	4.03;3.54	1.78;0.88	E3;BLUE	2
52	DST	MTA52	AX-109403595	9	3D	606714571	4.25;3.16	0.36;0.19	E5;BLUE	2	QNGPC.cau-3D (Lou et al. 2021)
53	MC	MTA53	AX-109869589	10	4A	115204240	3.04;3.52	0.06;0.05	E4;BLUE	2
54	DDT	MTA54	AX-111079186	10	4A	615335898	3.04;3.14	0.12;0.13	E3;E4	2	QGpc.dms-4A (Semagn et al. 2021); MTA112 (SL)(Xu et al. 2024)
55	Rmax	MTA55	AX-111593919	10	4A	723175924	3.84;5.45	24.46;12.01	E2;BLUE	2
56	DST	MTA56	AX-109433453	11	4B	7491923	3.05;3.37	0.16;0.14	E4;BLUE	2	QWA.caas.4BS (Jin et al. 2016), Loci_S11_9212182 (GPC)(Battenfield et al. 2018)
57	DST	MTA57	AX-110956311	11	4B	7839073	3.34;3.64	0.16;0.14	E4;BLUE	2	QWA.caas.4BS (Jin et al. 2016), Loci_S11_9212182 (GPC)(Battenfield et al. 2018)
58	DST	MTA58	AX-110058687	11	4B	7966167	3.19;3.55	0.30;0.26	E4;BLUE	2	QWA.caas.4BS (Jin et al. 2016), Loci_S11_9212182 (GPC)(Battenfield et al. 2018)
59	EXT	MTA59	AX-109310208	11	4B	545891397	3.57;3.64	4.48;3.84	E4;BLUE	2
60	WA	MTA60	AX-111617054	12	4D	1647013	3.16;3.15	-1.88;-0.85	E6;BLUE	2
61	WA	MTA61	AX-108790923	12	4D	1653789	3.29;3.66	-1.23;-0.99	E4;BLUE	2
62	DST	MTA62	AX-169337612	12	4D	149007112	5.9;7.23	-0.31;-0.23	E5;BLUE	2	MTA132 (TKW)(Xu et al. 2024)
63	MC	MTA63	AX-169335107	12	4D	345437900	7.76;3.37	0.11;0.06	E3;BLUE	2
64	EXT	MTA64	AX-111506476	13	5A	469529764	3.07;3.46	-5.61;-7.78	E3;E6	2	MTA151 (SC)(Xu et al. 2024)
65	TW	MTA65	AX-110980979	13	5A	595328519	3.25;3.15	-4.61;-2.32	E3;BLUE	2	Excalibur_c41710_417, wsnp_Ex_c55777_58153636 (GPC)(Godoy et al. 2018)
66	EXT	MTA66	AX-109363198	13	5A	682664369	3.32;3.15	1.97;1.58	E4;BLUE	2	QGpc.sdau-5A (Sun et al. 2008)
67	WGC	MTA67	AX-109319682	13	5A	686152597	3.16;3.38	0.64;0.41	E2;BLUE	2	QGpc.sdau-5A (Sun et al. 2008); wsnp_Ex_rep_c101323_86702413 (GPC)(Godoy et al. 2018); AX-158542602 (GPC)(Aleliūnas et al. 2024)
68	TW	MTA68	AX-110467026	13	5A	694203302	4.09;3.21	-2.55;-1.15	E4;BLUE	2	QGpc.dms-5A (Semagn et al. 2021); S5A_693326887 (GPC)(Sallam et al. 2020)
69	DST	MTA69	AX-110604539	14	5B	238073483	7.8;3.32	0.30;0.17	E4;BLUE	2
70	Rmax	MTA70	AX-111582953	14	5B	485193411	6.46;3.84;6.49	13.31;8.09;11.46	E3;E4;BLUE	3
71	DDT	MTA71	AX-110551395	14	5B	487443708	7.21;4.22	-0.31;-0.14	E5;BLUE	2	MTA179 (SL)(Xu et al. 2024); QSc.cau-5B.4 (Zhai H et al. 2016)
72	WA	MTA72	AX-108814349	14	5B	550824336	3.37;3.92;6.58	-2.15;-1.52;-1.60	E3;E5;BLUE	3	MTA180 (GN)(Xu et al. 2024); QKps.fcu-5B (Faris et al. 2014)
73	WA	MTA73	AX-111501794	14	5B	687419835	3.15;3.21	1.42;1.01	E3;E4	2	MTA190 (SLN)(Xu et al. 2024); QKps.fcu-5B (Faris et al. 2014)
74	WA	MTA74	AX-110186027	15	5D	281887720	3.2;4.64	-0.90;-0.79	E2;BLUE	2
75	WA	MTA75	AX-111496275	15	5D	286866753	3.12;3.42	0.84;0.62	E2;BLUE	2
76	WA	MTA76	AX-109586392	15	5D	287853534	3.12;4.23	-0.91;-0.76	E2;BLUE	2
77	DDT	MTA77	AX-110039178	15	5D	306541233	3.54;3.13	-0.17;-0.13	E4;BLUE	2
78	WGC/GPC	MTA78	AX-109184534	15	5D	497935791	3.35;3.14/3.24;3.2	-0.71;-0.43/-0.33;-0.24	E3;BLUE/E3;BLUE	2/2
79	GPC	MTA79	AX-110010904	16	6A	27706773	6.4;4.07	-0.37;-0.25	E3;BLUE	2
80	EA	MTA80	AX-109414803	16	6A	86990322	3.09;3.04	-4.66;-4.71	E3;E5	2
81	DDT/Rmax	MTA81	AX-109478902	16	6A	614687798	5.83;5.39/3.95;6.57;3.0;3.47	-0.17;-0.14/-9.25;-12.25;-14.77;-8.00	E3;BLUE/E3;E4;E5;BLUE	2/4	QTkw.dms-6A.3, QGpc.dms-6A (Semagn et al. 2021)
82	WGC	MTA82	AX-110669742	18	6D	25913506	3.61;5.33	0.52;0.40	E2;BLUE	2
83	WA	MTA83	AX-110351501	18	6D	348131011	3.12;3.1	-0.95;-0.68	E2;BLUE	2
84	WA	MTA84	AX-109891051	18	6D	365803919	5.47;3.57	-0.97;-1.01	E1;E2	2
85	WA	MTA85	AX-109010429	18	6D	477350809	3.26;3.05	1.61;1.17	E4;BLUE	2
86	WA/DDT/Rmax	MTA86	AX-111081645	18	6D	489439958	3.78;3.55;4.54/7.43;6.74/8.09;3.01	-1.63;-2.31;-1.28/-0.61;-0.35/-34.21;-14.84	E2;E3;BLUE/E1;E3/E3;BLUE	3/2/2
87	WGC	MTA87	AX-109644949	18	6D	490748728	7.75;4.48	-2.02;-1.21	E2;BLUE	2
88	GPC	MTA88	AX-110429116	18	6D	491662071	3.0;3.48	-0.48;-0.23	E5;BLUE	2
89	EXT/GPC	MTA89	AX-109401568	19	7A	116160041	4.05;6.97/3.32;4.11	-4.20;-4.01/-0.32;-0.29	E2;BLUE/E4;BLUE	2/2	MTA272 (SEL)(Xu et al. 2024)
90	DDT	MTA90	AX-111574093	19	7A	118937876	3.05;3.23	0.25;0.22	E4;BLUE	2	QWA.caas.7AS (Jin et al. 2016); MTA272 (SEL)(Xu et al. 2024)
91	DST	MTA91	AX-109822004	19	7A	527767140	3.69;5.19	-0.42;-0.22	E1;BLUE	2
92	WGC	MTA92	AX-110919886	19	7A	565619704	3.85;9.79	-0.97;-1.17	E4;BLUE	2	MTA272 (SEL)(Xu et al. 2024); AP3-1-7A/WPA3-7A (Hama et al. 2004)
93	GPC	MTA93	AX-110021101	19	7A	675473801	6.9;3.2	-0.83;-0.38	E6;BLUE	2	JD_c1201_631 (GPC)(Godoy et al. 2018); MTA278 (SLN)(Xu et al. 2024); QSns.sau-7A (Luo et al. 2016); QTsn.cau-7A.4 (Zhai et al. 2016); QSPS-7A.3 (Hu et al. 2020); QSPS-7A.4 (Hu et al. 2020); qSn-7A.2 (Cao et al. 2019); QTS.perg-7A (Pretini et al. 2020)
94	EXT	MTA94	AX-111635644	19	7A	676308821	4.95;6.24	-3.98;-3.39	E3;E4	2	JD_c1201_631 (GPC)(Godoy et al. 2018); MTA278 (SLN)(Xu et al. 2024); QSns.sau-7A (Luo et al. 2016); QTsn.cau-7A.4 (Zhai et al. 2016); QSPS-7A.3 (Hu et al. 2020); QSPS-7A.4 (Hu et al. 2020); qSn-7A.2 (Cao et al. 2019); QTS.perg-7A (Pretini et al. 2020)
95	WA	MTA95	AX-111190466	20	7B	16367687	8.54;3.21;3.47	-1.16;-0.95;-1.59	E1;E4;E6	3
96	WA	MTA96	AX-111060003	20	7B	484927293	3.56;3.45	1.16;0.57	E6;BLUE	2	MTA280/281 (GN)(Xu et al. 2024)
97	WA	MTA97	AX-110041647	20	7B	631137577	4.21;3.23	-0.88;-0.58	E4;BLUE	2	MTA309 (GN)(Xu et al. 2024)
98	WA	MTA98	AX-109904353	20	7B	631188610	3.77;3.03	-0.79;-0.53	E4;BLUE	2	MTA309 (GN)(Xu et al. 2024)
99	WGC	MTA99	AX-111699424	20	7B	694177524	3.02;3.03	-0.51;-0.79	E2;E6	2	QWA.caas.7BL (Jin et al. 2016); 581708 (WGC)(Alemu et al. 2021); MTA310 (GN)(Xu et al. 2024)
100	DST	MTA100	AX-110888456	21	7D	42804158	3.14;4.45	0.25;0.15	E5;BLUE	2
101	WA	MTA101	AX-111085399	21	7D	101650368	3.16;3.05	1.51;1.12	E4;BLUE	2
102	EXT	MTA102	AX-109399434	21	7D	201519920	3.06;3.64	-4.01;-3.49	E2;BLUE	2
GPC: grain protein content, TW: test weight, WGC: wet gluten content, MC: moisture content, WA: water absorption, DST: dough stability time, DDT: dough development time, EXT: extensibility, EA: extension area, Rmax: maximum resistance, SEL: spike exsertion length, SL: spike length, AL: awn length, SLN: spikelet number per spike, SC: spikelet compactness, GN: grain number per spike, GNC: grain num…

## Sheet: Sheet4
Table S4 Annotated genes significantly associated with the two major MTAs.
SNP	MTA_ID	Traits	Chr	Pos	Triticum aestivum (IWGSC RefSeqv2.1)	Strand	Location	Description	Oryza sativa	Arabidopsis thaliana
AX-109989063	MTA45	DST	8	52496521	TraesCS3B03G0146100	+	chr3B:47537095..47538165 (+ strand)	AP2/ERF and B3 domain-containing protein Os01g0141000	Os01g0141000	NA
AX-109989063	MTA45	DST	8	52496521	TraesCS3B03G0146400	+	chr3B:47778203..47778859 (+ strand)	AP2/ERF and B3 domain-containing protein Os01g0141000	Os01g0141000	NA
AX-109989063	MTA45	DST	8	52496521	TraesCS3B03G0147000	+	chr3B:48355502..48356971 (+ strand)	AP2/ERF and B3 domain-containing protein Os01g0141000	Os01g0141000	NA
AX-109989063	MTA45	DST	8	52496521	TraesCS3B03G0147100	-	chr3B:48420644..48428129 (- strand)	Protein SUPPRESSOR OF K(+) TRANSPORT GROWTH DEFECT 1	Os01g0141100	AT2G27600
AX-109989063	MTA45	DST	8	52496521	TraesCS3B03G0147300	-	chr3B:48699064..48699792 (- strand)	NA	NA	NA
AX-109989063	MTA45	DST	8	52496521	TraesCS3B03G0147500	-	chr3B:48860280..48860609 (- strand)	NA	NA	NA
AX-109989063	MTA45	DST	8	52496521	TraesCS3B03G0147600	-	chr3B:48890992..48891321 (- strand)	NA	NA	NA
AX-109989063	MTA45	DST	8	52496521	TraesCS3B03G0147900	-	chr3B:48915194..48916664 (- strand)	Inactive anthranilate O-methyltransferase 1	NA	NA
AX-109989063	MTA45	DST	8	52496521	TraesCS3B03G0148000	-	chr3B:48940491..48945011 (- strand)	Inactive anthranilate O-methyltransferase 1	NA	NA
AX-109989063	MTA45	DST	8	52496521	TraesCS3B03G0148100	+	chr3B:48995938..48997451 (+ strand)	UDP-glycosyltransferase 88B1	Os01g0697100	NA
AX-109989063	MTA45	DST	8	52496521	TraesCS3B03G0148200	+	chr3B:49006359..49007874 (+ strand)	Phloretin 2'-O-glucosyltransferase	Os01g0697100	NA
AX-109989063	MTA45	DST	8	52496521	TraesCS3B03G0148300	+	chr3B:49009772..49012728 (+ strand)	Protein root UVB sensitive 5	Os01g0141600	AT5G01510
AX-109989063	MTA45	DST	8	52496521	TraesCS3B03G0148400	-	chr3B:49014661..49018791 (- strand)	DNA damage-binding protein 2	Os01g0141700	AT5G58760
AX-109989063	MTA45	DST	8	52496521	TraesCS3B03G0148700	+	chr3B:49099224..49100240 (+ strand)	Mitogen-activated protein kinase kinase 7	NA	NA
AX-109989063	MTA45	DST	8	52496521	TraesCS3B03G0148900	-	chr3B:49124065..49125474 (- strand)	UDP-glycosyltransferase 83A1	Os03g0757100	NA
AX-109989063	MTA45	DST	8	52496521	TraesCS3B03G0149400	-	chr3B:49157162..49157986 (- strand)	Disease resistance protein RGA5	NA	NA
AX-109989063	MTA45	DST	8	52496521	TraesCS3B03G0149900	-	chr3B:49186222..49194936 (- strand)	UDP-glycosyltransferase 83A1	Os03g0757100	NA
AX-109989063	MTA45	DST	8	52496521	TraesCS3B03G0150000	-	chr3B:49192992..49193990 (- strand)	NA	NA	NA
AX-109989063	MTA45	DST	8	52496521	TraesCS3B03G0150200	-	chr3B:49358225..49359086 (- strand)	NA	NA	NA
AX-109989063	MTA45	DST	8	52496521	TraesCS3B03G0150300	+	chr3B:49367825..49368244 (+ strand)	NA	NA	NA
AX-109989063	MTA45	DST	8	52496521	TraesCS3B03G0150400	+	chr3B:49368316..49369371 (+ strand)	Cytochrome c oxidase subunit 1	BAC19897	ATMG01360
AX-109989063	MTA45	DST	8	52496521	TraesCS3B03G0150900	-	chr3B:49396155..49397548 (- strand)	Cytochrome b559 subunit alpha	CAA33965	ATCG00580
AX-109989063	MTA45	DST	8	52496521	TraesCS3B03G0151600	-	chr3B:49427118..49427354 (- strand)	NA	NA	NA
AX-109989063	MTA45	DST	8	52496521	TraesCS3B03G0152000	+	chr3B:49451897..49456625 (+ strand)	Probable zinc metalloprotease EGY2, chloroplastic	Os01g0142100	AT5G05740
AX-109989063	MTA45	DST	8	52496521	TraesCS3B03G0152200	-	chr3B:49456556..49461882 (- strand)	NA	Os01g0141900	NA
AX-109989063	MTA45	DST	8	52496521	TraesCS3B03G0152700	+	chr3B:49707654..49708869 (+ strand)	NA	NA	NA
AX-109989063	MTA45	DST	8	52496521	TraesCS3B03G0153000	-	chr3B:49727474..49729424 (- strand)	NA	NA	NA
AX-109989063	MTA45	DST	8	52496521	TraesCS3B03G0153200	+	chr3B:49768408..49768949 (+ strand)	NA	NA	NA
AX-109989063	MTA45	DST	8	52496521	TraesCS3B03G0153300	+	chr3B:49774943..49777458 (+ strand)	EKC/KEOPS complex subunit TPRKB	Os01g0142200	AT4G34412
AX-109989063	MTA45	DST	8	52496521	TraesCS3B03G0153400	+	chr3B:49779063..49782788 (+ strand)	Sulfoquinovosyl transferase SQD2	Os01g0142300	AT5G01220
AX-109989063	MTA45	DST	8	52496521	TraesCS3B03G0153600	-	chr3B:49787204..49790566 (- strand)	14-3-3-like protein B	Os02g0580300	AT5G38480
AX-109989063	MTA45	DST	8	52496521	TraesCS3B03G0153700	-	chr3B:49789560..49790219 (- strand)	F-box protein GID2	NA	NA
AX-109989063	MTA45	DST	8	52496521	TraesCS3B03G0153900	-	chr3B:49794320..49794775 (- strand)	Mitogen-activated protein kinase kinase 3	NA	NA
AX-109989063	MTA45	DST	8	52496521	TraesCS3B03G0154600	-	chr3B:50068484..50072326 (- strand)	Glutathione S-transferase F10	NA	NA
AX-109989063	MTA45	DST	8	52496521	TraesCS3B03G0154700	+	chr3B:50077736..50078278 (+ strand)	Probable nicotianamine synthase 3	Os03g0307200	NA
AX-109989063	MTA45	DST	8	52496521	TraesCS3B03G0154800	+	chr3B:50315898..50321285 (+ strand)	Probable nicotianamine synthase 3	Os03g0307200	NA
AX-109989063	MTA45	DST	8	52496521	TraesCS3B03G0154900	-	chr3B:50388399..50389151 (- strand)	NA	NA	NA
AX-109989063	MTA45	DST	8	52496521	TraesCS3B03G0155000	-	chr3B:50389823..50395380 (- strand)	Protein DETOXIFICATION 16	NA	NA
AX-109989063	MTA45	DST	8	52496521	TraesCS3B03G0155200	-	chr3B:50406395..50408215 (- strand)	Transcription factor DIVARICATA	Os01g0142500	NA
AX-109989063	MTA45	DST	8	52496521	TraesCS3B03G0155300	-	chr3B:50448818..50451038 (- strand)	Transcription factor DIVARICATA	Os01g0142500	NA
AX-109989063	MTA45	DST	8	52496521	TraesCS3B03G0155400	+	chr3B:50451339..50452253 (+ strand)	NA	NA	NA
AX-109989063	MTA45	DST	8	52496521	TraesCS3B03G0155800	-	chr3B:50552470..50554314 (- strand)	Protein NRT1/ PTR FAMILY 8.1	Os07g0100600	AT5G01180
AX-109989063	MTA45	DST	8	52496521	TraesCS3B03G0156500	-	chr3B:50680368..50681580 (- strand)	Cysteine-rich receptor-like protein kinase 36	NA	NA
AX-109989063	MTA45	DST	8	52496521	TraesCS3B03G0157500	+	chr3B:50938799..50942742 (+ strand)	GTP-binding protein YPTM2	Os02g0653800	AT1G02130
AX-109989063	MTA45	DST	8	52496521	TraesCS3B03G0157700	-	chr3B:50959198..50961700 (- strand)	Protein NRT1/ PTR FAMILY 8.2	Os07g0100600	AT5G01180
AX-109989063	MTA45	DST	8	52496521	TraesCS3B03G0158600	-	chr3B:51228213..51229514 (- strand)	Sinapine esterase	NA	NA
AX-109989063	MTA45	DST	8	52496521	TraesCS3B03G0158700	-	chr3B:51236718..51237566 (- strand)	Berberine bridge enzyme-like Cyn d 4	Os06g0549900	NA
AX-109989063	MTA45	DST	8	52496521	TraesCS3B03G0159100	-	chr3B:51284427..51286144 (- strand)	Protein NRT1/ PTR FAMILY 8.2	Os07g0100600	AT5G01180
AX-109989063	MTA45	DST	8	52496521	TraesCS3B03G0159200	+	chr3B:51416484..51418430 (+ strand)	Glycerol-3-phosphate acyltransferase ATS11, chloroplastic	NA	NA
AX-109989063	MTA45	DST	8	52496521	TraesCS3B03G0159500	+	chr3B:51564394..51565307 (+ strand)	NA	NA	NA
AX-109989063	MTA45	DST	8	52496521	TraesCS3B03G0159600	+	chr3B:51573215..51575409 (+ strand)	NA	NA	NA
AX-109989063	MTA45	DST	8	52496521	TraesCS3B03G0159800	+	chr3B:51652956..51654278 (+ strand)	NA	NA	NA
AX-109989063	MTA45	DST	8	52496521	TraesCS3B03G0159900	+	chr3B:51726202..51731269 (+ strand)	NA	NA	NA
AX-109989063	MTA45	DST	8	52496521	TraesCS3B03G0160300	+	chr3B:51778513..51780679 (+ strand)	NA	NA	NA
AX-109989063	MTA45	DST	8	52496521	TraesCS3B03G0161400	-	chr3B:52317806..52319023 (- strand)	Transcription factor bHLH93	NA	NA
AX-109989063	MTA45	DST	8	52496521	TraesCS3B03G0161500	-	chr3B:52420811..52423345 (- strand)	NA	NA	NA
AX-109989063	MTA45	DST	8	52496521	TraesCS3B03G0161900	+	chr3B:52507363..52512367 (+ strand)	Myosin-17	Os01g0584200	NA
AX-109989063	MTA45	DST	8	52496521	TraesCS3B03G0162200	-	chr3B:52575539..52578633 (- strand)	Mitochondrial substrate carrier family protein B	Os01g0143100	AT3G55640
AX-109989063	MTA45	DST	8	52496521	TraesCS3B03G0162400	-	chr3B:52645457..52645600 (- strand)	NA	Os01g0525350	AT1G13245
AX-109989063	MTA45	DST	8	52496521	TraesCS3B03G0162700	-	chr3B:52651693..52651833 (- strand)	NA	Os05g0549232	AT3G25717
AX-109989063	MTA45	DST	8	52496521	TraesCS3B03G0163200	-	chr3B:52809547..52811409 (- strand)	NA	NA	NA
AX-109989063	MTA45	DST	8	52496521	TraesCS3B03G0164000	-	chr3B:52986059..52991447 (- strand)	Bromodomain and WD repeat-containing protein 1	Os03g0306200	NA
AX-109989063	MTA45	DST	8	52496521	TraesCS3B03G0164100	+	chr3B:53001510..53002355 (+ strand)	NA	NA	NA
AX-109989063	MTA45	DST	8	52496521	TraesCS3B03G0164200	+	chr3B:53041000..53042000 (+ strand)	NA	NA	NA
AX-109989063	MTA45	DST	8	52496521	TraesCS3B03G0164400	-	chr3B:53133996..53135679 (- strand)	Putative F-box protein At4g22660	Os11g0574725	NA
AX-109989063	MTA45	DST	8	52496521	TraesCS3B03G0164600	+	chr3B:53199061..53199399 (+ strand)	NA	NA	NA
AX-109989063	MTA45	DST	8	52496521	TraesCS3B03G0164700	-	chr3B:53216892..53220048 (- strand)	Uncharacterized protein At2g39795, mitochondrial	Os01g0143300	NA
AX-109989063	MTA45	DST	8	52496521	TraesCS3B03G0164800	+	chr3B:53254054..53255460 (+ strand)	F-box protein KIB4	Os11g0574725	NA
AX-109989063	MTA45	DST	8	52496521	TraesCS3B03G0165000	-	chr3B:53286253..53287719 (- strand)	Uncharacterized protein At2g39795, mitochondrial	Os01g0143300	NA
AX-109989063	MTA45	DST	8	52496521	TraesCS3B03G0165200	-	chr3B:53362037..53363974 (- strand)	Uncharacterized protein At2g39795, mitochondrial	Os01g0143300	NA
AX-109989063	MTA45	DST	8	52496521	TraesCS3B03G0165600	-	chr3B:53663437..53665847 (- strand)	Receptor-like protein 12	Os04g0534166	AT5G21090
AX-109989063	MTA45	DST	8	52496521	TraesCS3B03G0165900	-	chr3B:53693875..53697329 (- strand)	Uncharacterized protein At2g39795, mitochondrial	Os01g0143800	NA
AX-109989063	MTA45	DST	8	52496521	TraesCS3B03G0166000	+	chr3B:53817451..53819282 (+ strand)	NA	NA	NA
AX-109989063	MTA45	DST	8	52496521	TraesCS3B03G0166500	-	chr3B:53873175..53873387 (- strand)	NA	Os01g0143900	NA
AX-109989063	MTA45	DST	8	52496521	TraesCS3B03G0166600	-	chr3B:53874126..53878431 (- strand)	Probable pectin methylesterase CGR2 [UniProtKB/Swiss-Prot:Q9M2Y6]	Os01g0144000	AT3G49720
AX-109989063	MTA45	DST	8	52496521	TraesCS3B03G0166800	+	chr3B:53957140..53958594 (+ strand)	Probable LRR receptor-like serine/threonine-protein kinase At3g47570	Os11g0173800	AT5G21090
AX-109989063	MTA45	DST	8	52496521	TraesCS3B03G0167000	+	chr3B:53969624..53976420 (+ strand)	Probable LRR receptor-like serine/threonine-protein kinase At3g47570	Os11g0173432	NA
AX-109989063	MTA45	DST	8	52496521	TraesCS3B03G0167200	+	chr3B:53982335..53990139 (+ strand)	Probable LRR receptor-like serine/threonine-protein kinase At3g47570	Os11g0172350	NA
AX-109989063	MTA45	DST	8	52496521	TraesCS3B03G0167400	+	chr3B:54063763..54075780 (+ strand)	Probable LRR receptor-like serine/threonine-protein kinase At3g47570	Os11g0173432	NA
AX-109989063	MTA45	DST	8	52496521	TraesCS3B03G0167500	-	chr3B:54075900..54077996 (- strand)	Thylakoid lumenal 15 kDa protein 1, chloroplastic	Os01g0144100	AT2G44920
AX-109989063	MTA45	DST	8	52496521	TraesCS3B03G0167700	+	chr3B:54169598..54181281 (+ strand)	Probable LRR receptor-like serine/threonine-protein kinase At3g47570	Os11g0173432	NA
AX-109989063	MTA45	DST	8	52496521	TraesCS3B03G0167800	-	chr3B:54181586..54183535 (- strand)	Thylakoid lumenal 15 kDa protein 1, chloroplastic	Os01g0144100	AT2G44920
AX-109989063	MTA45	DST	8	52496521	TraesCS3B03G0167900	+	chr3B:54340438..54341496 (+ strand)	BTB/POZ and MATH domain-containing protein 2	NA	NA
AX-109989063	MTA45	DST	8	52496521	TraesCS3B03G0168100	+	chr3B:54390353..54391456 (+ strand)	BTB/POZ and MATH domain-containing protein 2	NA	NA
AX-109989063	MTA45	DST	8	52496521	TraesCS3B03G0168200	+	chr3B:54395121..54398324 (+ strand)	NA	NA	NA
AX-109989063	MTA45	DST	8	52496521	TraesCS3B03G0168300	+	chr3B:54414740..54417977 (+ strand)	Glucose-induced degradation protein 4 homolog	Os01g0144200	AT2G37680
AX-109989063	MTA45	DST	8	52496521	TraesCS3B03G0168400	-	chr3B:54418154..54419944 (- strand)	NA	Os01g0144300	NA
AX-109989063	MTA45	DST	8	52496521	TraesCS3B03G0169000	-	chr3B:54791649..54799213 (- strand)	Polycomb group protein EMF2B	Os09g0306800	NA
AX-109989063	MTA45	DST	8	52496521	TraesCS3B03G0169700	-	chr3B:54905689..54907080 (- strand)	NA	NA	NA
AX-109989063	MTA45	DST	8	52496521	TraesCS3B03G0169800	-	chr3B:54916376..54920065 (- strand)	Probable LRR receptor-like serine/threonine-protein kinase At3g47570	NA	NA
AX-109989063	MTA45	DST	8	52496521	TraesCS3B03G0170000	-	chr3B:54988951..54989708 (- strand)	NA	NA	NA
AX-109989063	MTA45	DST	8	52496521	TraesCS3B03G0170300	-	chr3B:55326140..55326848 (- strand)	NA	NA	NA
AX-109989063	MTA45	DST	8	52496521	TraesCS3B03G0170400	+	chr3B:55409049..55411467 (+ strand)	indole-2-monooxygenase	NA	NA
AX-109989063	MTA45	DST	8	52496521	TraesCS3B03G0170500	+	chr3B:55409415..55411066 (+ strand)	indole-2-monooxygenase	NA	NA
AX-109989063	MTA45	DST	8	52496521	TraesCS3B03G0170700	+	chr3B:55413707..55414267 (+ strand)	indolin-2-one monooxygenase	Os08g0106000	NA
AX-109989063	MTA45	DST	8	52496521	TraesCS3B03G0170800	-	chr3B:55793208..55793863 (- strand)	NA	NA	NA
AX-109989063	MTA45	DST	8	52496521	TraesCS3B03G0170900	-	chr3B:55861219..55861767 (- strand)	NA	NA	NA
AX-109989063	MTA45	DST	8	52496521	TraesCS3B03G0171000	+	chr3B:56010641..56015195 (+ strand)	Protein MAK16 homolog B	Os07g0270900	AT1G23280
AX-109989063	MTA45	DST	8	52496521	TraesCS3B03G0171100	+	chr3B:56034680..56035961 (+ strand)	E3 ubiquitin-protein ligase SINA-like 10	NA	NA
AX-109989063	MTA45	DST	8	52496521	TraesCS3B03G0171400	-	chr3B:56500185..56500667 (- strand)	NA	NA	NA
AX-109989063	MTA45	DST	8	52496521	TraesCS3B03G0171600	-	chr3B:56525364..56526032 (- strand)	Germin-like protein 11-1	Os11g0537350	NA
AX-109989063	MTA45	DST	8	52496521	TraesCS3B03G0171800	+	chr3B:56552736..56556480 (+ strand)	NA	NA	NA
AX-109989063	MTA45	DST	8	52496521	TraesCS3B03G0172000	-	chr3B:56594262..56597333 (- strand)	NA	NA	NA
AX-109989063	MTA45	DST	8	52496521	TraesCS3B03G0172400	+	chr3B:56774157..56775404 (+ strand)	Thaumatin-like protein	NA	NA
AX-109989063	MTA45	DST	8	52496521	TraesCS3B03G0172800	-	chr3B:56856677..56858641 (- strand)	NA	NA	NA
AX-109989063	MTA45	DST	8	52496521	TraesCS3B03G0172900	-	chr3B:56887395..56887943 (- strand)	NA	NA	NA
AX-109989063	MTA45	DST	8	52496521	TraesCS3B03G0173000	-	chr3B:56961241..56962351 (- strand)	Germin-like protein 8-12	Os08g0231400	AT5G39150
AX-109989063	MTA45	DST	8	52496521	TraesCS3B03G0173200	-	chr3B:57104431..57105764 (- strand)	Germin-like protein 8-12	Os08g0231400	AT5G39180
AX-109989063	MTA45	DST	8	52496521	TraesCS3B03G0173300	+	chr3B:57257645..57259708 (+ strand)	NA	NA	NA
AX-109478902	MTA81	DDT/Rmax	16	614687798	TraesCS6A03G0987600	+	chr6A:609857445..609861964 (+ strand)	Telomere-binding protein 1	Os02g0817800	NA
AX-109478902	MTA81	DDT/Rmax	16	614687798	TraesCS6A03G0987700	+	chr6A:609865913..609869344 (+ strand)	3-ketoacyl-CoA thiolase 2, peroxisomal	Os02g0817700	AT2G33150
AX-109478902	MTA81	DDT/Rmax	16	614687798	TraesCS6A03G0987800	+	chr6A:609871428..609876309 (+ strand)	50S ribosomal protein L13	Os08g0162033	AT3G01790
AX-109478902	MTA81	DDT/Rmax	16	614687798	TraesCS6A03G0987900	+	chr6A:609879364..609881164 (+ strand)	Auxin-responsive protein IAA10	Os02g0817600	NA
AX-109478902	MTA81	DDT/Rmax	16	614687798	TraesCS6A03G0988000	-	chr6A:609881282..609886662 (- strand)	Probable voltage-gated potassium channel subunit beta	Os02g0817500	AT1G04690
AX-109478902	MTA81	DDT/Rmax	16	614687798	TraesCS6A03G0988100	+	chr6A:609887710..609893186 (+ strand)	Riboflavin biosynthesis protein PYRR, chloroplastic	Os02g0473000	AT3G47390
AX-109478902	MTA81	DDT/Rmax	16	614687798	TraesCS6A03G0988200	-	chr6A:609894169..609894711 (- strand)	NA	NA	NA
AX-109478902	MTA81	DDT/Rmax	16	614687798	TraesCS6A03G0988700	-	chr6A:609948823..609951002 (- strand)	Protein-lysine methyltransferase METTL21D	Os02g0818700	AT1G08125
AX-109478902	MTA81	DDT/Rmax	16	614687798	TraesCS6A03G0988800	+	chr6A:609951098..609953777 (+ strand)	Pentatricopeptide repeat-containing protein At2g29760, chloroplastic	Os02g0818800	NA
AX-109478902	MTA81	DDT/Rmax	16	614687798	TraesCS6A03G0989000	+	chr6A:609953899..609955437 (+ strand)	NA	Os02g0818900	NA
AX-109478902	MTA81	DDT/Rmax	16	614687798	TraesCS6A03G0989900	+	chr6A:610289566..610290286 (+ strand)	NA	Os02g0818900	NA
AX-109478902	MTA81	DDT/Rmax	16	614687798	TraesCS6A03G0990000	+	chr6A:610296956..610297880 (+ strand)	NA	Os02g0818900	NA
AX-109478902	MTA81	DDT/Rmax	16	614687798	TraesCS6A03G0990100	+	chr6A:610304183..610305707 (+ strand)	NA	Os02g0818900	NA
AX-109478902	MTA81	DDT/Rmax	16	614687798	TraesCS6A03G0990400	+	chr6A:610321489..610323749 (+ strand)	Heavy metal-associated isoprenylated plant protein 6	Os02g0819000	NA
AX-109478902	MTA81	DDT/Rmax	16	614687798	TraesCS6A03G0990500	-	chr6A:610327643..610335670 (- strand)	NA	NA	NA
AX-109478902	MTA81	DDT/Rmax	16	614687798	TraesCS6A03G0991400	+	chr6A:610574251..610578101 (+ strand)	Probable protein S-acyltransferase 15	Os02g0819100	NA
AX-109478902	MTA81	DDT/Rmax	16	614687798	TraesCS6A03G0992600	-	chr6A:610820726..610824926 (- strand)	Pentatricopeptide repeat-containing protein At2g27610	Os05g0455900	AT2G27610
AX-109478902	MTA81	DDT/Rmax	16	614687798	TraesCS6A03G0992800	+	chr6A:610825015..610827457 (+ strand)	Thioredoxin-like 3-2, chloroplastic	Os02g0819200	NA
AX-109478902	MTA81	DDT/Rmax	16	614687798	TraesCS6A03G0992900	+	chr6A:610842542..610848528 (+ strand)	Pumilio homolog 4 [UniProtKB/Swiss-Prot:Q9SS47]	Os02g0819300	NA
AX-109478902	MTA81	DDT/Rmax	16	614687798	TraesCS6A03G0993000	-	chr6A:610848937..610852307 (- strand)	P-loop NTPase domain-containing protein LPA1	Os02g0819400	AT3G45090
AX-109478902	MTA81	DDT/Rmax	16	614687798	TraesCS6A03G0993500	+	chr6A:610946362..610946676 (+ strand)	NA	NA	NA
AX-109478902	MTA81	DDT/Rmax	16	614687798	TraesCS6A03G0993600	+	chr6A:610963350..610965006 (+ strand)	Protein C2-DOMAIN ABA-RELATED 5	Os07g0501700	NA
AX-109478902	MTA81	DDT/Rmax	16	614687798	TraesCS6A03G0993700	-	chr6A:610968059..610972694 (- strand)	OVARIAN TUMOR DOMAIN-containing deubiquitinating enzyme 9	Os02g0819500	NA
AX-109478902	MTA81	DDT/Rmax	16	614687798	TraesCS6A03G0993800	-	chr6A:610979740..610985139 (- strand)	Serine/threonine-protein kinase PCRK1	Os02g0819600	AT3G09830
AX-109478902	MTA81	DDT/Rmax	16	614687798	TraesCS6A03G0993900	+	chr6A:611003383..611008759 (+ strand)	ABC transporter G family member 28	Os11g0416900	AT2G37010
AX-109478902	MTA81	DDT/Rmax	16	614687798	TraesCS6A03G0994000	-	chr6A:611008920..611010626 (- strand)	DNL-type zinc finger protein	Os02g0819700	NA
AX-109478902	MTA81	DDT/Rmax	16	614687798	TraesCS6A03G0994200	-	chr6A:611015351..611016058 (- strand)	NA	NA	NA
AX-109478902	MTA81	DDT/Rmax	16	614687798	TraesCS6A03G0994700	-	chr6A:611105674..611107007 (- strand)	NA	Os02g0818900	NA
AX-109478902	MTA81	DDT/Rmax	16	614687798	TraesCS6A03G0995100	-	chr6A:611166780..611167361 (- strand)	NA	Os02g0818900	NA
AX-109478902	MTA81	DDT/Rmax	16	614687798	TraesCS6A03G0995300	-	chr6A:611179047..611179620 (- strand)	NA	NA	NA
AX-109478902	MTA81	DDT/Rmax	16	614687798	TraesCS6A03G0995700	-	chr6A:611244374..611245405 (- strand)	NA	NA	NA
AX-109478902	MTA81	DDT/Rmax	16	614687798	TraesCS6A03G0995800	+	chr6A:611253774..611256354 (+ strand)	NA	NA	NA
AX-109478902	MTA81	DDT/Rmax	16	614687798	TraesCS6A03G0996000	-	chr6A:611268610..611269588 (- strand)	NA	NA	NA
AX-109478902	MTA81	DDT/Rmax	16	614687798	TraesCS6A03G0996200	-	chr6A:611286758..611290886 (- strand)	NA	NA	NA
AX-109478902	MTA81	DDT/Rmax	16	614687798	TraesCS6A03G0996500	-	chr6A:611350917..611352359 (- strand)	NA	NA	NA
AX-109478902	MTA81	DDT/Rmax	16	614687798	TraesCS6A03G0996600	-	chr6A:611376528..611379321 (- strand)	Putative receptor protein kinase ZmPK1	Os02g0777400	NA
AX-109478902	MTA81	DDT/Rmax	16	614687798	TraesCS6A03G0996800	-	chr6A:611390216..611395215 (- strand)	NA	NA	NA
AX-109478902	MTA81	DDT/Rmax	16	614687798	TraesCS6A03G0997300	+	chr6A:611508956..611510634 (+ strand)	LysM domain receptor-like kinase 3	Os02g0819900	NA
AX-109478902	MTA81	DDT/Rmax	16	614687798	TraesCS6A03G0997600	-	chr6A:611515015..611518734 (- strand)	Serine/threonine-protein phosphatase PP1	Os02g0820000	AT5G59160
AX-109478902	MTA81	DDT/Rmax	16	614687798	TraesCS6A03G0997800	+	chr6A:611527512..611527944 (+ strand)	NA	NA	NA
AX-109478902	MTA81	DDT/Rmax	16	614687798	TraesCS6A03G0997900	-	chr6A:611542562..611546470 (- strand)	NA	NA	NA
AX-109478902	MTA81	DDT/Rmax	16	614687798	TraesCS6A03G0998000	-	chr6A:611561698..611564195 (- strand)	NA	Os02g0793500	NA
AX-109478902	MTA81	DDT/Rmax	16	614687798	TraesCS6A03G0998300	+	chr6A:611593018..611595433 (+ strand)	NA	Os02g0793500	NA
AX-109478902	MTA81	DDT/Rmax	16	614687798	TraesCS6A03G0998500	-	chr6A:611674307..611676105 (- strand)	NA	Os02g0793500	NA
AX-109478902	MTA81	DDT/Rmax	16	614687798	TraesCS6A03G0998600	-	chr6A:611741440..611743314 (- strand)	NA	Os02g0793500	NA
AX-109478902	MTA81	DDT/Rmax	16	614687798	TraesCS6A03G0998700	-	chr6A:611754761..611755713 (- strand)	Uncharacterized tatC-like protein ymf16	BAC19865	ATMG00570
AX-109478902	MTA81	DDT/Rmax	16	614687798	TraesCS6A03G0998800	-	chr6A:611759164..611763712 (- strand)	NA	NA	NA
AX-109478902	MTA81	DDT/Rmax	16	614687798	TraesCS6A03G0998900	-	chr6A:611763747..611764478 (- strand)	NADH-ubiquinone oxidoreductase chain 1	BAC19852	AT2G07785
AX-109478902	MTA81	DDT/Rmax	16	614687798	TraesCS6A03G0999100	-	chr6A:611782475..611784862 (- strand)	NA	Os02g0793500	NA
AX-109478902	MTA81	DDT/Rmax	16	614687798	TraesCS6A03G0999200	+	chr6A:611848523..611851059 (+ strand)	NA	Os02g0793500	NA
AX-109478902	MTA81	DDT/Rmax	16	614687798	TraesCS6A03G0999400	+	chr6A:611858589..611860578 (+ strand)	NA	Os02g0793500	NA
AX-109478902	MTA81	DDT/Rmax	16	614687798	TraesCS6A03G0999500	+	chr6A:611883379..611885755 (+ strand)	NA	Os02g0793500	NA
AX-109478902	MTA81	DDT/Rmax	16	614687798	TraesCS6A03G0999600	-	chr6A:611900639..611904877 (- strand)	NA	NA	NA
AX-109478902	MTA81	DDT/Rmax	16	614687798	TraesCS6A03G0999700	+	chr6A:611911566..611912647 (+ strand)	RING-H2 finger protein ATL1	Os02g0820200	NA
AX-109478902	MTA81	DDT/Rmax	16	614687798	TraesCS6A03G0999800	-	chr6A:611912778..611917264 (- strand)	Protein KINESIN LIGHT CHAIN-RELATED 2	Os02g0820300	NA
AX-109478902	MTA81	DDT/Rmax	16	614687798	TraesCS6A03G0999900	-	chr6A:611922593..611924380 (- strand)	Coumaroyl-CoA:anthocyanidin 3-O-glucoside-6''-O-coumaroyltransferase 2	Os02g0820400	NA
AX-109478902	MTA81	DDT/Rmax	16	614687798	TraesCS6A03G1000100	-	chr6A:611936559..611938040 (- strand)	NA	NA	NA
AX-109478902	MTA81	DDT/Rmax	16	614687798	TraesCS6A03G1000200	+	chr6A:611970579..611971646 (+ strand)	BTB/POZ and MATH domain-containing protein 2	NA	NA
AX-109478902	MTA81	DDT/Rmax	16	614687798	TraesCS6A03G1000300	-	chr6A:611985589..611986632 (- strand)	LOB domain-containing protein 16	Os02g0820500	AT4G00220
AX-109478902	MTA81	DDT/Rmax	16	614687798	TraesCS6A03G1000400	-	chr6A:611988290..611991668 (- strand)	NA	Os02g0820600	NA
AX-109478902	MTA81	DDT/Rmax	16	614687798	TraesCS6A03G1000500	+	chr6A:612016333..612022452 (+ strand)	Protein LUTEIN DEFICIENT 5, chloroplastic	Os02g0817900	AT1G31800
AX-109478902	MTA81	DDT/Rmax	16	614687798	TraesCS6A03G1000600	-	chr6A:612027263..612028597 (- strand)	Nicotianamine synthase 2	NA	NA
AX-109478902	MTA81	DDT/Rmax	16	614687798	TraesCS6A03G1000700	+	chr6A:612035756..612037585 (+ strand)	Glucan endo-1,3-beta-glucosidase 8	Os06g0590600	AT5G64790
AX-109478902	MTA81	DDT/Rmax	16	614687798	TraesCS6A03G1000800	-	chr6A:612039135..612041888 (- strand)	FBD-associated F-box protein At5g18780	NA	AT4G00160
AX-109478902	MTA81	DDT/Rmax	16	614687798	TraesCS6A03G1000900	-	chr6A:612044113..612047126 (- strand)	Deoxyhypusine hydroxylase-B	Os12g0626100	AT3G58180
AX-109478902	MTA81	DDT/Rmax	16	614687798	TraesCS6A03G1001000	+	chr6A:612046860..612051225 (+ strand)	Bet1-like SNARE 1-1	Os02g0820700	AT3G58170
AX-109478902	MTA81	DDT/Rmax	16	614687798	TraesCS6A03G1001100	+	chr6A:612054103..612055713 (+ strand)	AT-hook motif nuclear-localized protein 20	Os02g0820800	AT4G00200
AX-109478902	MTA81	DDT/Rmax	16	614687798	TraesCS6A03G1001500	+	chr6A:612130809..612136430 (+ strand)	T-complex protein 1 subunit zeta 1	Os05g0147400	AT3G02530
AX-109478902	MTA81	DDT/Rmax	16	614687798	TraesCS6A03G1001600	+	chr6A:612162757..612166922 (+ strand)	Ethylene receptor 3	Os02g0820900	NA
AX-109478902	MTA81	DDT/Rmax	16	614687798	TraesCS6A03G1001800	-	chr6A:612253941..612255717 (- strand)	Calmodulin-binding receptor-like cytoplasmic kinase 2	Os02g0821400	AT4G00330
AX-109478902	MTA81	DDT/Rmax	16	614687798	TraesCS6A03G1001900	-	chr6A:612257401..612261413 (- strand)	Probable E3 ubiquitin-protein ligase RHB1A	Os11g0294600	AT4G00335
AX-109478902	MTA81	DDT/Rmax	16	614687798	TraesCS6A03G1002000	-	chr6A:612279301..612280644 (- strand)	NA	Os10g0135100	NA
AX-109478902	MTA81	DDT/Rmax	16	614687798	TraesCS6A03G1002100	+	chr6A:612294990..612302188 (+ strand)	Putative B3 domain-containing protein Os03g0621600	NA	NA
AX-109478902	MTA81	DDT/Rmax	16	614687798	TraesCS6A03G1002300	-	chr6A:612302979..612304701 (- strand)	NA	Os10g0135100	NA
AX-109478902	MTA81	DDT/Rmax	16	614687798	TraesCS6A03G1002400	+	chr6A:612323185..612330780 (+ strand)	Putative aconitate hydratase, cytoplasmic	Os08g0191100	AT4G35830
AX-109478902	MTA81	DDT/Rmax	16	614687798	TraesCS6A03G1002600	-	chr6A:612355210..612357188 (- strand)	Protein DETOXIFICATION 34	Os02g0821600	AT4G00350
AX-109478902	MTA81	DDT/Rmax	16	614687798	TraesCS6A03G1002700	+	chr6A:612427118..612429239 (+ strand)	Protein DETOXIFICATION 34	Os02g0821600	AT4G00350
AX-109478902	MTA81	DDT/Rmax	16	614687798	TraesCS6A03G1002900	+	chr6A:612434506..612437312 (+ strand)	rRNA 2'-O-methyltransferase fibrillarin 1	Os02g0821800	AT5G52470
AX-109478902	MTA81	DDT/Rmax	16	614687798	TraesCS6A03G1003100	-	chr6A:612440050..612441756 (- strand)	NA	Os02g0793500	AT4G00160
AX-109478902	MTA81	DDT/Rmax	16	614687798	TraesCS6A03G1003200	+	chr6A:612448517..612453463 (+ strand)	Receptor-like protein EIX2	NA	NA
AX-109478902	MTA81	DDT/Rmax	16	614687798	TraesCS6A03G1004100	+	chr6A:612543646..612563304 (+ strand)	Receptor-like protein EIX2	NA	NA
AX-109478902	MTA81	DDT/Rmax	16	614687798	TraesCS6A03G1004400	-	chr6A:612590418..612593115 (- strand)	Probable LRR receptor-like serine/threonine-protein kinase At3g47570	NA	NA
AX-109478902	MTA81	DDT/Rmax	16	614687798	TraesCS6A03G1004600	+	chr6A:612596736..612617479 (+ strand)	Receptor-like protein EIX2	NA	NA
AX-109478902	MTA81	DDT/Rmax	16	614687798	TraesCS6A03G1004700	+	chr6A:612602437..612609176 (+ strand)	Putative disease resistance protein RGA1	NA	NA
AX-109478902	MTA81	DDT/Rmax	16	614687798	TraesCS6A03G1004800	+	chr6A:612664381..612671322 (+ strand)	Disease resistance protein RGA2	NA	NA
AX-109478902	MTA81	DDT/Rmax	16	614687798	TraesCS6A03G1004900	+	chr6A:612670248..612670945 (+ strand)	Disease resistance protein RPV1	Os01g0937400	AT1G69550
AX-109478902	MTA81	DDT/Rmax	16	614687798	TraesCS6A03G1005100	-	chr6A:612687607..612695630 (- strand)	Probable LRR receptor-like serine/threonine-protein kinase At3g47570	NA	NA
AX-109478902	MTA81	DDT/Rmax	16	614687798	TraesCS6A03G1005600	-	chr6A:612756660..612759932 (- strand)	Rust resistance kinase Lr10	Os02g0819600	AT4G00330
AX-109478902	MTA81	DDT/Rmax	16	614687798	TraesCS6A03G1005900	-	chr6A:612771619..612773196 (- strand)	NA	NA	NA
AX-109478902	MTA81	DDT/Rmax	16	614687798	TraesCS6A03G1006000	-	chr6A:612845727..612847335 (- strand)	ATG8-interacting protein 1	Os02g0821900	AT4G00355
AX-109478902	MTA81	DDT/Rmax	16	614687798	TraesCS6A03G1006100	-	chr6A:612856136..612856881 (- strand)	Histone H2AX	Os12g0530000	AT1G54690
AX-109478902	MTA81	DDT/Rmax	16	614687798	TraesCS6A03G1006600	+	chr6A:612997094..612998541 (+ strand)	BTB/POZ and MATH domain-containing protein 3	NA	NA
AX-109478902	MTA81	DDT/Rmax	16	614687798	TraesCS6A03G1006700	+	chr6A:613059640..613061331 (+ strand)	NA	NA	NA
AX-109478902	MTA81	DDT/Rmax	16	614687798	TraesCS6A03G1006800	+	chr6A:613068189..613072140 (+ strand)	Uncharacterized protein At1g76660	Os02g0822000	NA
AX-109478902	MTA81	DDT/Rmax	16	614687798	TraesCS6A03G1006900	+	chr6A:613074597..613078453 (+ strand)	Silicon efflux transporter LSI2	Os02g0822100	AT1G02260
AX-109478902	MTA81	DDT/Rmax	16	614687798	TraesCS6A03G1007400	+	chr6A:613138576..613147841 (+ strand)	G-type lectin S-receptor-like serine/threonine-protein kinase SD2-5	Os02g0819600	AT4G00330
AX-109478902	MTA81	DDT/Rmax	16	614687798	TraesCS6A03G1007500	-	chr6A:613152073..613153634 (- strand)	Mitochondrial metalloendopeptidase OMA1	NA	NA
AX-109478902	MTA81	DDT/Rmax	16	614687798	TraesCS6A03G1007600	-	chr6A:613156519..613157995 (- strand)	Mitochondrial metalloendopeptidase OMA1	NA	NA
AX-109478902	MTA81	DDT/Rmax	16	614687798	TraesCS6A03G1007700	-	chr6A:613180697..613183799 (- strand)	Protein BTR1	Os02g0822300	NA
AX-109478902	MTA81	DDT/Rmax	16	614687798	TraesCS6A03G1007900	-	chr6A:613219130..613222651 (- strand)	Ubiquitin carboxyl-terminal hydrolase 2	Os02g0822200	AT1G65650
AX-109478902	MTA81	DDT/Rmax	16	614687798	TraesCS6A03G1008100	+	chr6A:613260115..613261017 (+ strand)	NA	NA	NA
AX-109478902	MTA81	DDT/Rmax	16	614687798	TraesCS6A03G1008300	-	chr6A:613293804..613296282 (- strand)	G-type lectin S-receptor-like serine/threonine-protein kinase SD2-5	NA	NA
AX-109478902	MTA81	DDT/Rmax	16	614687798	TraesCS6A03G1008600	-	chr6A:613434954..613441435 (- strand)	Oligoribonuclease	Os02g0465500	AT2G26970
AX-109478902	MTA81	DDT/Rmax	16	614687798	TraesCS6A03G1009000	+	chr6A:613534969..613537581 (+ strand)	NA	Os02g0793500	NA
AX-109478902	MTA81	DDT/Rmax	16	614687798	TraesCS6A03G1009200	-	chr6A:613544040..613547366 (- strand)	Disease resistance protein PIK6-NP	Os02g0818500	NA
AX-109478902	MTA81	DDT/Rmax	16	614687798	TraesCS6A03G1009600	-	chr6A:613615254..613622011 (- strand)	Disease resistance protein RGA5	Os02g0824500	NA
AX-109478902	MTA81	DDT/Rmax	16	614687798	TraesCS6A03G1009900	+	chr6A:613629892..613631137 (+ strand)	NA	NA	NA
AX-109478902	MTA81	DDT/Rmax	16	614687798	TraesCS6A03G1010300	+	chr6A:613666904..613667709 (+ strand)	Wheatwin-1	Os11g0592000	AT3G04720
AX-109478902	MTA81	DDT/Rmax	16	614687798	TraesCS6A03G1010400	-	chr6A:613676104..613685391 (- strand)	Disease resistance protein RGA5	Os02g0818500	NA
AX-109478902	MTA81	DDT/Rmax	16	614687798	TraesCS6A03G1010900	-	chr6A:613822013..613825547 (- strand)	Disease resistance protein RGA5	Os02g0818500	NA
AX-109478902	MTA81	DDT/Rmax	16	614687798	TraesCS6A03G1011000	-	chr6A:613877485..613878816 (- strand)	Remorin	Os02g0824500	AT2G45820
AX-109478902	MTA81	DDT/Rmax	16	614687798	TraesCS6A03G1011200	+	chr6A:613918226..613919980 (+ strand)	NA	Os02g0824400	AT2G45860
AX-109478902	MTA81	DDT/Rmax	16	614687798	TraesCS6A03G1011300	+	chr6A:613922456..613926855 (+ strand)	AT-hook motif nuclear-localized protein 5	Os02g0824300	AT2G45850
AX-109478902	MTA81	DDT/Rmax	16	614687798	TraesCS6A03G1011400	+	chr6A:613949542..613950762 (+ strand)	Divinyl chlorophyllide a 8-vinyl-reductase, chloroplastic	Os03g0351200	AT5G18660
AX-109478902	MTA81	DDT/Rmax	16	614687798	TraesCS6A03G1011600	-	chr6A:613951609..613954608 (- strand)	Putative disease resistance protein At1g50180	Os11g0633500	NA
AX-109478902	MTA81	DDT/Rmax	16	614687798	TraesCS6A03G1011800	-	chr6A:613963624..613965965 (- strand)	Putative late blight resistance protein homolog R1B-14	NA	NA
AX-109478902	MTA81	DDT/Rmax	16	614687798	TraesCS6A03G1012000	+	chr6A:613975789..613976295 (+ strand)	Zinc finger A20 and AN1 domain-containing stress-associated protein 9	NA	NA
AX-109478902	MTA81	DDT/Rmax	16	614687798	TraesCS6A03G1012100	+	chr6A:613980675..613981166 (+ strand)	Zinc finger A20 and AN1 domain-containing stress-associated protein 9	NA	NA
AX-109478902	MTA81	DDT/Rmax	16	614687798	TraesCS6A03G1012700	+	chr6A:614002397..614002630 (+ strand)	NA	NA	NA
AX-109478902	MTA81	DDT/Rmax	16	614687798	TraesCS6A03G1012800	+	chr6A:614008388..614010487 (+ strand)	NA	Os02g0813200	NA
AX-109478902	MTA81	DDT/Rmax	16	614687798	TraesCS6A03G1012900	+	chr6A:614025219..614026716 (+ strand)	NA	Os02g0813200	NA
AX-109478902	MTA81	DDT/Rmax	16	614687798	TraesCS6A03G1013200	-	chr6A:614095474..614097555 (- strand)	Cytochrome P450 714C2	Os02g0824100	AT2G45970
AX-109478902	MTA81	DDT/Rmax	16	614687798	TraesCS6A03G1013300	+	chr6A:614214138..614215702 (+ strand)	Zinc finger protein ZAT5	Os02g0823900	AT5G04390
AX-109478902	MTA81	DDT/Rmax	16	614687798	TraesCS6A03G1013400	-	chr6A:614306328..614310196 (- strand)	Serine/threonine-protein phosphatase PP1	Os02g0820000	AT5G59160
AX-109478902	MTA81	DDT/Rmax	16	614687798	TraesCS6A03G1013500	-	chr6A:614313462..614318456 (- strand)	Protein SMG8	Os02g0823800	NA
AX-109478902	MTA81	DDT/Rmax	16	614687798	TraesCS6A03G1013600	-	chr6A:614323280..614326911 (- strand)	NA	NA	NA
AX-109478902	MTA81	DDT/Rmax	16	614687798	TraesCS6A03G1013700	-	chr6A:614328770..614331057 (- strand)	Rop guanine nucleotide exchange factor 3	Os07g0481100	AT2G45890
AX-109478902	MTA81	DDT/Rmax	16	614687798	TraesCS6A03G1013800	-	chr6A:614332129..614338318 (- strand)	Smad nuclear-interacting protein 1	Os05g0545600	NA
AX-109478902	MTA81	DDT/Rmax	16	614687798	TraesCS6A03G1014000	-	chr6A:614344524..614346755 (- strand)	Caffeic acid 3-O-methyltransferase	Os02g0823400	AT3G53140
AX-109478902	MTA81	DDT/Rmax	16	614687798	TraesCS6A03G1014200	-	chr6A:614350756..614352276 (- strand)	Disease resistance protein RGA5	NA	NA
AX-109478902	MTA81	DDT/Rmax	16	614687798	TraesCS6A03G1014400	-	chr6A:614425949..614432105 (- strand)	NA	Os02g0823300	AT5G04460
AX-109478902	MTA81	DDT/Rmax	16	614687798	TraesCS6A03G1014900	-	chr6A:614498846..614508354 (- strand)	Lysine-specific histone demethylase 1 homolog 3	Os10g0532150	NA
AX-109478902	MTA81	DDT/Rmax	16	614687798	TraesCS6A03G1015200	+	chr6A:614528980..614530571 (+ strand)	Aquaporin PIP1-5	Os02g0823100	AT2G45960
AX-109478902	MTA81	DDT/Rmax	16	614687798	TraesCS6A03G1015400	-	chr6A:614537405..614539077 (- strand)	Aquaporin PIP1-5	Os02g0823100	AT2G45960
AX-109478902	MTA81	DDT/Rmax	16	614687798	TraesCS6A03G1015500	+	chr6A:614548655..614552439 (+ strand)	Peptidyl-prolyl cis-trans isomerase	Os02g0121300	AT2G21130
AX-109478902	MTA81	DDT/Rmax	16	614687798	TraesCS6A03G1015800	+	chr6A:614556629..614557132 (+ strand)	Peptidyl-prolyl cis-trans isomerase	Os02g0121300	AT2G21130
AX-109478902	MTA81	DDT/Rmax	16	614687798	TraesCS6A03G1016100	-	chr6A:614578955..614584825 (- strand)	Signal peptide peptidase-like 4	Os02g0823000	AT1G63690
AX-109478902	MTA81	DDT/Rmax	16	614687798	TraesCS6A03G1016300	-	chr6A:614591394..614593371 (- strand)	NA	NA	NA
AX-109478902	MTA81	DDT/Rmax	16	614687798	TraesCS6A03G1016400	+	chr6A:614671638..614676026 (+ strand)	NA	NA	NA
AX-109478902	MTA81	DDT/Rmax	16	614687798	TraesCS6A03G1016500	-	chr6A:614678847..614681191 (- strand)	NA	NA	NA
AX-109478902	MTA81	DDT/Rmax	16	614687798	TraesCS6A03G1016600	+	chr6A:614723806..614729607 (+ strand)	Acyl-CoA-binding domain-containing protein 4	Os02g0822800	AT5G04420
AX-109478902	MTA81	DDT/Rmax	16	614687798	TraesCS6A03G1016700	+	chr6A:614820141..614823133 (+ strand)	50S ribosomal protein L9, chloroplastic	Os02g0822600	AT3G44890
AX-109478902	MTA81	DDT/Rmax	16	614687798	TraesCS6A03G1016900	+	chr6A:614863344..614867148 (+ strand)	Phosphatidylinositol 4-phosphate 5-kinase 9	Os02g0822500	AT3G09920
AX-109478902	MTA81	DDT/Rmax	16	614687798	TraesCS6A03G1017000	-	chr6A:614870363..614874907 (- strand)	NAC domain-containing protein 78	Os02g0822400	AT5G04395
AX-109478902	MTA81	DDT/Rmax	16	614687798	TraesCS6A03G1017300	+	chr6A:614914592..614916528 (+ strand)	NA	NA	NA
AX-109478902	MTA81	DDT/Rmax	16	614687798	TraesCS6A03G1017900	-	chr6A:615118261..615121402 (- strand)	NA	NA	NA
AX-109478902	MTA81	DDT/Rmax	16	614687798	TraesCS6A03G1018100	-	chr6A:615134224..615137448 (- strand)	NA	NA	NA
AX-109478902	MTA81	DDT/Rmax	16	614687798	TraesCS6A03G1018400	-	chr6A:615188283..615191588 (- strand)	Protein COP1 SUPPRESSOR 2	Os03g0374100	AT1G02330
AX-109478902	MTA81	DDT/Rmax	16	614687798	TraesCS6A03G1018500	+	chr6A:615197399..615200639 (+ strand)	Protein COP1 SUPPRESSOR 2	Os03g0374100	AT1G02330
AX-109478902	MTA81	DDT/Rmax	16	614687798	TraesCS6A03G1018900	+	chr6A:615299471..615302500 (+ strand)	NA	NA	NA
AX-109478902	MTA81	DDT/Rmax	16	614687798	TraesCS6A03G1019000	+	chr6A:615308219..615311409 (+ strand)	NA	NA	NA
AX-109478902	MTA81	DDT/Rmax	16	614687798	TraesCS6A03G1019400	-	chr6A:615336362..615341656 (- strand)	NA	NA	NA
AX-109478902	MTA81	DDT/Rmax	16	614687798	TraesCS6A03G1019700	-	chr6A:615573416..615576612 (- strand)	NA	NA	NA
AX-109478902	MTA81	DDT/Rmax	16	614687798	TraesCS6A03G1021000	+	chr6A:616080444..616083307 (+ strand)	NA	NA	NA
AX-109478902	MTA81	DDT/Rmax	16	614687798	TraesCS6A03G1021100	-	chr6A:616092349..616095041 (- strand)	NA	NA	NA
AX-109478902	MTA81	DDT/Rmax	16	614687798	TraesCS6A03G1021200	+	chr6A:616095348..616098654 (+ strand)	NA	NA	NA
AX-109478902	MTA81	DDT/Rmax	16	614687798	TraesCS6A03G1021400	-	chr6A:616098924..616102578 (- strand)	NA	NA	NA
AX-109478902	MTA81	DDT/Rmax	16	614687798	TraesCS6A03G1022100	-	chr6A:616236971..616238551 (- strand)	Xyloglucan endotransglycosylase/hydrolase protein 8	Os08g0237000	NA
AX-109478902	MTA81	DDT/Rmax	16	614687798	TraesCS6A03G1022300	+	chr6A:616245227..616246338 (+ strand)	Light-harvesting complex-like protein OHP1, chloroplastic	Os05g0292800	AT5G02120
AX-109478902	MTA81	DDT/Rmax	16	614687798	TraesCS6A03G1022500	+	chr6A:616267388..616268100 (+ strand)	NA	NA	NA
AX-109478902	MTA81	DDT/Rmax	16	614687798	TraesCS6A03G1022700	-	chr6A:616303631..616305985 (- strand)	L-type lectin-domain containing receptor kinase SIT2	Os07g0132500	NA
AX-109478902	MTA81	DDT/Rmax	16	614687798	TraesCS6A03G1022900	-	chr6A:616309911..616312614 (- strand)	NA	NA	NA
AX-109478902	MTA81	DDT/Rmax	16	614687798	TraesCS6A03G1023300	+	chr6A:616313342..616315407 (+ strand)	L-type lectin-domain containing receptor kinase SIT2	NA	NA
AX-109478902	MTA81	DDT/Rmax	16	614687798	TraesCS6A03G1023400	-	chr6A:616316560..616319325 (- strand)	NA	NA	NA
AX-109478902	MTA81	DDT/Rmax	16	614687798	TraesCS6A03G1023500	+	chr6A:616320247..616321911 (+ strand)	L-type lectin-domain containing receptor kinase SIT2	NA	NA
AX-109478902	MTA81	DDT/Rmax	16	614687798	TraesCS6A03G1023600	-	chr6A:616324488..616329571 (- strand)	DEAD-box ATP-dependent RNA helicase 48	Os02g0826100	AT5G08620
AX-109478902	MTA81	DDT/Rmax	16	614687798	TraesCS6A03G1023700	+	chr6A:616330177..616333439 (+ strand)	Methionine adenosyltransferase 2 subunit beta	Os02g0826200	AT4G00560
AX-109478902	MTA81	DDT/Rmax	16	614687798	TraesCS6A03G1023900	+	chr6A:616335782..616336069 (+ strand)	NA	Os02g0826300	NA
AX-109478902	MTA81	DDT/Rmax	16	614687798	TraesCS6A03G1024000	+	chr6A:616344094..616348922 (+ strand)	NA	NA	NA
AX-109478902	MTA81	DDT/Rmax	16	614687798	TraesCS6A03G1024100	-	chr6A:616353063..616353792 (- strand)	NA	NA	NA
AX-109478902	MTA81	DDT/Rmax	16	614687798	TraesCS6A03G1024200	-	chr6A:616354623..616358077 (- strand)	Electron transfer flavoprotein subunit beta, mitochondrial	Os04g0182800	AT5G43430
AX-109478902	MTA81	DDT/Rmax	16	614687798	TraesCS6A03G1024500	+	chr6A:616363764..616364581 (+ strand)	NA	NA	NA
AX-109478902	MTA81	DDT/Rmax	16	614687798	TraesCS6A03G1024800	-	chr6A:616477045..616483442 (- strand)	ABC transporter F family member 3	Os02g0826500	AT1G64550
AX-109478902	MTA81	DDT/Rmax	16	614687798	TraesCS6A03G1024900	+	chr6A:616487217..616490620 (+ strand)	F-box/LRR-repeat protein 14	Os02g0798900	NA
AX-109478902	MTA81	DDT/Rmax	16	614687798	TraesCS6A03G1025000	+	chr6A:616574312..616575151 (+ strand)	NA	NA	NA
AX-109478902	MTA81	DDT/Rmax	16	614687798	TraesCS6A03G1025200	+	chr6A:616591333..616592250 (+ strand)	NA	NA	NA
AX-109478902	MTA81	DDT/Rmax	16	614687798	TraesCS6A03G1025300	-	chr6A:616610258..616617184 (- strand)	Plant intracellular Ras-group-related LRR protein 6	Os02g0826600	AT3G15410
AX-109478902	MTA81	DDT/Rmax	16	614687798	TraesCS6A03G1025400	-	chr6A:616627262..616628132 (- strand)	NA	NA	NA
AX-109478902	MTA81	DDT/Rmax	16	614687798	TraesCS6A03G1025500	+	chr6A:616633722..616634303 (+ strand)	NA	NA	NA
AX-109478902	MTA81	DDT/Rmax	16	614687798	TraesCS6A03G1025900	+	chr6A:616687928..616688494 (+ strand)	NA	NA	NA
AX-109478902	MTA81	DDT/Rmax	16	614687798	TraesCS6A03G1026200	+	chr6A:616754707..616758547 (+ strand)	Probable prolyl 4-hydroxylase 3	Os02g0827100	AT1G20270
AX-109478902	MTA81	DDT/Rmax	16	614687798	TraesCS6A03G1026400	+	chr6A:616761113..616765953 (+ strand)	Sucrose transport protein SUT4	Os02g0827200	AT2G02860
AX-109478902	MTA81	DDT/Rmax	16	614687798	TraesCS6A03G1026500	-	chr6A:616766267..616767690 (- strand)	NA	NA	NA
AX-109478902	MTA81	DDT/Rmax	16	614687798	TraesCS6A03G1026700	-	chr6A:616787416..616788603 (- strand)	NA	NA	NA
AX-109478902	MTA81	DDT/Rmax	16	614687798	TraesCS6A03G1026800	+	chr6A:616827814..616833726 (+ strand)	Splicing factor 3B subunit 2	Os02g0827300	NA
AX-109478902	MTA81	DDT/Rmax	16	614687798	TraesCS6A03G1027000	+	chr6A:616879994..616881269 (+ strand)	NA	NA	NA
AX-109478902	MTA81	DDT/Rmax	16	614687798	TraesCS6A03G1027200	-	chr6A:616886116..616891287 (- strand)	Disease resistance protein RGA2	NA	NA
AX-109478902	MTA81	DDT/Rmax	16	614687798	TraesCS6A03G1027600	+	chr6A:616922586..616924502 (+ strand)	Putative disease resistance protein RGA3	NA	NA
AX-109478902	MTA81	DDT/Rmax	16	614687798	TraesCS6A03G1027700	+	chr6A:616929796..616930155 (+ strand)	NA	NA	NA
AX-109478902	MTA81	DDT/Rmax	16	614687798	TraesCS6A03G1027800	+	chr6A:616934578..616934925 (+ strand)	NA	NA	NA
AX-109478902	MTA81	DDT/Rmax	16	614687798	TraesCS6A03G1028100	+	chr6A:616943540..616944057 (+ strand)	NA	NA	NA
AX-109478902	MTA81	DDT/Rmax	16	614687798	TraesCS6A03G1028200	+	chr6A:616944888..616948055 (+ strand)	Disease resistance protein RGA2	NA	NA
AX-109478902	MTA81	DDT/Rmax	16	614687798	TraesCS6A03G1028300	+	chr6A:616950199..616959245 (+ strand)	Disease resistance protein PIK6-NP	NA	NA
AX-109478902	MTA81	DDT/Rmax	16	614687798	TraesCS6A03G1028400	+	chr6A:616964048..616970718 (+ strand)	Wall-associated receptor kinase 5	Os02g0833000	NA
AX-109478902	MTA81	DDT/Rmax	16	614687798	TraesCS6A03G1028500	+	chr6A:616977468..616980898 (+ strand)	Disease resistance protein RGA5	NA	NA
AX-109478902	MTA81	DDT/Rmax	16	614687798	TraesCS6A03G1028700	-	chr6A:616982719..616988273 (- strand)	Testis-expressed protein 2	Os02g0827500	NA
AX-109478902	MTA81	DDT/Rmax	16	614687798	TraesCS6A03G1028800	+	chr6A:616997850..617000182 (+ strand)	Ankyrin-1	NA	NA
AX-109478902	MTA81	DDT/Rmax	16	614687798	TraesCS6A03G1028900	-	chr6A:617001818..617004357 (- strand)	NA	Os02g0827400	NA
AX-109478902	MTA81	DDT/Rmax	16	614687798	TraesCS6A03G1029000	-	chr6A:617092088..617092834 (- strand)	NA	NA	NA
AX-109478902	MTA81	DDT/Rmax	16	614687798	TraesCS6A03G1029100	-	chr6A:617093380..617096012 (- strand)	Ankyrin repeat-containing protein At5g02620	NA	NA
AX-109478902	MTA81	DDT/Rmax	16	614687798	TraesCS6A03G1029300	-	chr6A:617122759..617125948 (- strand)	Ankyrin repeat-containing protein At5g02620	NA	NA
AX-109478902	MTA81	DDT/Rmax	16	614687798	TraesCS6A03G1029500	-	chr6A:617156253..617160211 (- strand)	Wall-associated receptor kinase 4	Os02g0833000	NA
AX-109478902	MTA81	DDT/Rmax	16	614687798	TraesCS6A03G1030300	+	chr6A:617723230..617724979 (+ strand)	Transcription factor TCP7	Os02g0828566	NA
AX-109478902	MTA81	DDT/Rmax	16	614687798	TraesCS6A03G1030700	+	chr6A:617783462..617787429 (+ strand)	Probable L-ascorbate peroxidase 8, chloroplastic	Os02g0553200	AT1G77490
AX-109478902	MTA81	DDT/Rmax	16	614687798	TraesCS6A03G1030900	-	chr6A:617789450..617789692 (- strand)	NA	Os02g0828800	NA
AX-109478902	MTA81	DDT/Rmax	16	614687798	TraesCS6A03G1031100	-	chr6A:617819935..617820159 (- strand)	NA	NA	NA
AX-109478902	MTA81	DDT/Rmax	16	614687798	TraesCS6A03G1031300	-	chr6A:617861265..617862218 (- strand)	Gibberellin-regulated protein 8	NA	NA
AX-109478902	MTA81	DDT/Rmax	16	614687798	TraesCS6A03G1031400	-	chr6A:617863793..617867050 (- strand)	4-hydroxybenzoate polyprenyltransferase, mitochondrial	Os08g0389300	AT4G23660
AX-109478902	MTA81	DDT/Rmax	16	614687798	TraesCS6A03G1031700	-	chr6A:617925294..617928818 (- strand)	Replication protein A 32 kDa subunit A	Os02g0829100	NA
AX-109478902	MTA81	DDT/Rmax	16	614687798	TraesCS6A03G1031900	+	chr6A:617937485..617938229 (+ strand)	Putative ripening-related protein 2	Os02g0637000	NA
AX-109478902	MTA81	DDT/Rmax	16	614687798	TraesCS6A03G1032000	-	chr6A:617942527..617946278 (- strand)	Tyrosine--tRNA ligase 1, cytoplasmic	Os08g0150800	AT1G28350
AX-109478902	MTA81	DDT/Rmax	16	614687798	TraesCS6A03G1032100	-	chr6A:617984594..617989915 (- strand)	Uncharacterized protein PYUK71.03c	Os02g0829200	AT3G19830
AX-109478902	MTA81	DDT/Rmax	16	614687798	TraesCS6A03G1032200	+	chr6A:618000223..618001285 (+ strand)	NA	NA	NA
AX-109478902	MTA81	DDT/Rmax	16	614687798	TraesCS6A03G1032400	+	chr6A:618006610..618010819 (+ strand)	F-box protein At5g07610	NA	NA
AX-109478902	MTA81	DDT/Rmax	16	614687798	TraesCS6A03G1032500	-	chr6A:618012443..618017426 (- strand)	Disease resistance protein RGA5	NA	NA
AX-109478902	MTA81	DDT/Rmax	16	614687798	TraesCS6A03G1032600	-	chr6A:618028835..618029974 (- strand)	Disease resistance protein RGA5	NA	NA
AX-109478902	MTA81	DDT/Rmax	16	614687798	TraesCS6A03G1032700	-	chr6A:618029986..618036642 (- strand)	Disease resistance protein RGA5	NA	NA
AX-109478902	MTA81	DDT/Rmax	16	614687798	TraesCS6A03G1033000	-	chr6A:618281127..618282619 (- strand)	Disease resistance protein RGA5	NA	NA
AX-109478902	MTA81	DDT/Rmax	16	614687798	TraesCS6A03G1033100	-	chr6A:618284291..618285184 (- strand)	Disease resistance protein RGA5	NA	NA
AX-109478902	MTA81	DDT/Rmax	16	614687798	TraesCS6A03G1033200	-	chr6A:618284291..618285462 (- strand)	Disease resistance protein RGA5	NA	NA
AX-109478902	MTA81	DDT/Rmax	16	614687798	TraesCS6A03G1033500	-	chr6A:618364767..618367033 (- strand)	Disease resistance protein RGA5	NA	NA
AX-109478902	MTA81	DDT/Rmax	16	614687798	TraesCS6A03G1033700	-	chr6A:618364882..618368862 (- strand)	Disease resistance protein RGA5	NA	NA
AX-109478902	MTA81	DDT/Rmax	16	614687798	TraesCS6A03G1033900	-	chr6A:618381917..618384035 (- strand)	Disease resistance protein RGA5	NA	NA
AX-109478902	MTA81	DDT/Rmax	16	614687798	TraesCS6A03G1034000	-	chr6A:618389771..618390752 (- strand)	Disease resistance protein RGA5	NA	NA
AX-109478902	MTA81	DDT/Rmax	16	614687798	TraesCS6A03G1034600	-	chr6A:618456169..618459412 (- strand)	Disease resistance protein RGA5	NA	NA
AX-109478902	MTA81	DDT/Rmax	16	614687798	TraesCS6A03G1034700	-	chr6A:618466637..618468275 (- strand)	Disease resistance protein Piks-2	NA	NA
AX-109478902	MTA81	DDT/Rmax	16	614687798	TraesCS6A03G1035100	-	chr6A:618505388..618506200 (- strand)	NA	NA	NA
AX-109478902	MTA81	DDT/Rmax	16	614687798	TraesCS6A03G1035500	-	chr6A:618546418..618547882 (- strand)	Disease resistance protein RGA5	NA	NA
AX-109478902	MTA81	DDT/Rmax	16	614687798	TraesCS6A03G1035800	-	chr6A:618784074..618788656 (- strand)	Disease resistance protein RGA5	NA	NA
AX-109478902	MTA81	DDT/Rmax	16	614687798	TraesCS6A03G1035900	-	chr6A:618794620..618798916 (- strand)	Disease resistance protein RGA5	NA	NA
AX-109478902	MTA81	DDT/Rmax	16	614687798	TraesCS6A03G1036000	+	chr6A:618805046..618809950 (+ strand)	NA	Os02g0829400	AT3G19870
AX-109478902	MTA81	DDT/Rmax	16	614687798	TraesCS6A03G1036200	+	chr6A:618812676..618813614 (+ strand)	NA	Os10g0144000	NA
AX-109478902	MTA81	DDT/Rmax	16	614687798	TraesCS6A03G1036400	-	chr6A:618822086..618824583 (- strand)	Cysteine-rich receptor-like protein kinase 40	Os02g0833000	NA
AX-109478902	MTA81	DDT/Rmax	16	614687798	TraesCS6A03G1036500	+	chr6A:618850058..618852281 (+ strand)	NA	Os10g0144000	NA
AX-109478902	MTA81	DDT/Rmax	16	614687798	TraesCS6A03G1036800	-	chr6A:618870337..618880717 (- strand)	Cysteine-rich receptor-like protein kinase 40	Os02g0833000	NA
AX-109478902	MTA81	DDT/Rmax	16	614687798	TraesCS6A03G1037000	+	chr6A:618966292..618971357 (+ strand)	Putative disease resistance protein RGA4	NA	NA
AX-109478902	MTA81	DDT/Rmax	16	614687798	TraesCS6A03G1037100	-	chr6A:618971718..618974735 (- strand)	NA	Os10g0144000	NA
AX-109478902	MTA81	DDT/Rmax	16	614687798	TraesCS6A03G1037400	-	chr6A:619038657..619042941 (- strand)	U-box domain-containing protein 63	Os02g0829600	AT3G19895
AX-109478902	MTA81	DDT/Rmax	16	614687798	TraesCS6A03G1037500	-	chr6A:619048677..619049445 (- strand)	NA	NA	NA
AX-109478902	MTA81	DDT/Rmax	16	614687798	TraesCS6A03G1037600	-	chr6A:619064119..619067065 (- strand)	NA	NA	NA
AX-109478902	MTA81	DDT/Rmax	16	614687798	TraesCS6A03G1038200	+	chr6A:619134388..619138116 (+ strand)	Probable 3-ketoacyl-CoA synthase 20	Os10g0416200	AT2G26640
AX-109478902	MTA81	DDT/Rmax	16	614687798	TraesCS6A03G1038500	+	chr6A:619446447..619447188 (+ strand)	NA	NA	NA
AX-109478902	MTA81	DDT/Rmax	16	614687798	TraesCS6A03G1038600	+	chr6A:619463009..619463762 (+ strand)	NA	NA	NA
AX-109478902	MTA81	DDT/Rmax	16	614687798	TraesCS6A03G1039300	-	chr6A:619584487..619587038 (- strand)	NA	NA	NA
AX-109478902	MTA81	DDT/Rmax	16	614687798	TraesCS6A03G1039700	-	chr6A:619601265..619603809 (- strand)	NA	NA	NA
AX-109478902	MTA81	DDT/Rmax	16	614687798	TraesCS6A03G1039800	+	chr6A:619604559..619606480 (+ strand)	Pentatricopeptide repeat-containing protein At1g61870, mitochondrial	Os02g0829800	NA
AX-109478902	MTA81	DDT/Rmax	16	614687798	TraesCS6A03G1039900	-	chr6A:619607422..619608185 (- strand)	NA	NA	AT3G19900
AX-109478902	MTA81	DDT/Rmax	16	614687798	TraesCS6A03G1040100	-	chr6A:619613257..619619803 (- strand)	NA	NA	NA
AX-109478902	MTA81	DDT/Rmax	16	614687798	TraesCS6A03G1040400	-	chr6A:619621778..619622359 (- strand)	NA	NA	NA
AX-109478902	MTA81	DDT/Rmax	16	614687798	TraesCS6A03G1040500	-	chr6A:619629501..619635464 (- strand)	Organellar oligopeptidase A, chloroplastic/mitochondrial	Os02g0830100	AT5G10540
AX-109478902	MTA81	DDT/Rmax	16	614687798	TraesCS6A03G1040600	-	chr6A:619636743..619638713 (- strand)	Two-component response regulator ORR3	Os02g0830200	NA
AX-109478902	MTA81	DDT/Rmax	16	614687798	TraesCS6A03G1040700	-	chr6A:619639999..619648185 (- strand)	Uncharacterized protein At2g24330	NA	NA

## Sheet: Sheet5
Table S5 Primers used in allele identification.
Primer name	Type	Sequence (5'–3')	Fluorophore
KASP-MTA45-F1	Primer Seq Allele X	GAAGGTGACCAAGTTCATGCTCCACCAAGGTAATCGGTTG	FAM
KASP-MTA45-F2	Primer Seq Allele Y	GAAGGTCGGAGTCAACGGATTGCCACCAAGGTAATCGGTTT	HEX
KASP-MTA45-R	Primer Seq common	CCAGTAGCGAACAATTTTGTACTTT	-
KASP-MTA81-F1	Primer Seq Allele X	GAAGGTGACCAAGTTCATGCTTTATGCGTCTAACCAACATAGCC	FAM
KASP-MTA81-F2	Primer Seq Allele Y	GAAGGTCGGAGTCAACGGATTTTATTATGCGTCTAACCAACATAGCT	HEX
KASP-MTA81-R	Primer Seq common	TGACAGCTTCGGTGCTGCT	-

## Sheet: Sheet6
Table S6 Comparison of genomic prediction accuracy for quality traits using all SNPs versus MTA-specific SNPs
Trait	Model_Type	SNP_Set	Mean_Accuracy
ALL trait	GBLUP	All_SNPs	0.484608
ALL trait	GBLUP	MTA_SNPs	0.61418
ALL trait	BL	All_SNPs	0.356835
ALL trait	BL	MTA_SNPs	0.550401
ALL trait	BC	All_SNPs	0.484375
ALL trait	BC	MTA_SNPs	0.597012
ALL trait	RKHS	All_SNPs	0.4878
ALL trait	RKHS	MTA_SNPs	0.609014
ALL trait	RF	All_SNPs	0.495322
ALL trait	RF	MTA_SNPs	0.579906
GPC	GBLUP	All_SNPs	0.632077
GPC	GBLUP	MTA_SNPs	0.677419
GPC	BL	All_SNPs	0.474694
GPC	BL	MTA_SNPs	0.601159
GPC	BC	All_SNPs	0.637717
GPC	BC	MTA_SNPs	0.65558
GPC	RKHS	All_SNPs	0.638452
GPC	RKHS	MTA_SNPs	0.693267
GPC	RF	All_SNPs	0.626839
GPC	RF	MTA_SNPs	0.647907
TW	GBLUP	All_SNPs	0.482088
TW	GBLUP	MTA_SNPs	0.480607
TW	BL	All_SNPs	0.399237
TW	BL	MTA_SNPs	0.442515
TW	BC	All_SNPs	0.406157
TW	BC	MTA_SNPs	0.483311
TW	RKHS	All_SNPs	0.446419
TW	RKHS	MTA_SNPs	0.467195
TW	RF	All_SNPs	0.419258
TW	RF	MTA_SNPs	0.511192
MC	GBLUP	All_SNPs	0.311491
MC	GBLUP	MTA_SNPs	0.42917
MC	BL	All_SNPs	0.160939
MC	BL	MTA_SNPs	0.346156
MC	BC	All_SNPs	0.30492
MC	BC	MTA_SNPs	0.40601
MC	RKHS	All_SNPs	0.325329
MC	RKHS	MTA_SNPs	0.425899
MC	RF	All_SNPs	0.339184
MC	RF	MTA_SNPs	0.40195
WGC	GBLUP	All_SNPs	0.476874
WGC	GBLUP	MTA_SNPs	0.63458
WGC	BL	All_SNPs	0.311362
WGC	BL	MTA_SNPs	0.553928
WGC	BC	All_SNPs	0.505114
WGC	BC	MTA_SNPs	0.633402
WGC	RKHS	All_SNPs	0.493075
WGC	RKHS	MTA_SNPs	0.609057
WGC	RF	All_SNPs	0.513455
WGC	RF	MTA_SNPs	0.595525
WA	GBLUP	All_SNPs	0.538815
WA	GBLUP	MTA_SNPs	0.706064
WA	BL	All_SNPs	0.456088
WA	BL	MTA_SNPs	0.664683
WA	BC	All_SNPs	0.590645
WA	BC	MTA_SNPs	0.6885
WA	RKHS	All_SNPs	0.550707
WA	RKHS	MTA_SNPs	0.71075
WA	RF	All_SNPs	0.572365
WA	RF	MTA_SNPs	0.668328
DST	GBLUP	All_SNPs	0.469755
DST	GBLUP	MTA_SNPs	0.623079
DST	BL	All_SNPs	0.339362
DST	BL	MTA_SNPs	0.56189
DST	BC	All_SNPs	0.466732
DST	BC	MTA_SNPs	0.615861
DST	RKHS	All_SNPs	0.462453
DST	RKHS	MTA_SNPs	0.621206
DST	RF	All_SNPs	0.498452
DST	RF	MTA_SNPs	0.601415
DDT	GBLUP	All_SNPs	0.515355
DDT	GBLUP	MTA_SNPs	0.695316
DDT	BL	All_SNPs	0.413244
DDT	BL	MTA_SNPs	0.617325
DDT	BC	All_SNPs	0.510204
DDT	BC	MTA_SNPs	0.659747
DDT	RKHS	All_SNPs	0.524637
DDT	RKHS	MTA_SNPs	0.684972
DDT	RF	All_SNPs	0.498414
DDT	RF	MTA_SNPs	0.631851
EXT	GBLUP	All_SNPs	0.479202
EXT	GBLUP	MTA_SNPs	0.610537
EXT	BL	All_SNPs	0.325392
EXT	BL	MTA_SNPs	0.553359
EXT	BC	All_SNPs	0.488979
EXT	BC	MTA_SNPs	0.597034
EXT	RKHS	All_SNPs	0.485351
EXT	RKHS	MTA_SNPs	0.604449
EXT	RF	All_SNPs	0.505545
EXT	RF	MTA_SNPs	0.564385
EA	GBLUP	All_SNPs	0.450897
EA	GBLUP	MTA_SNPs	0.598939
EA	BL	All_SNPs	0.337051
EA	BL	MTA_SNPs	0.528405
EA	BC	All_SNPs	0.446695
EA	BC	MTA_SNPs	0.57305
EA	RKHS	All_SNPs	0.448802
EA	RKHS	MTA_SNPs	0.594957
EA	RF	All_SNPs	0.472385
EA	RF	MTA_SNPs	0.53536
Rmax	GBLUP	All_SNPs	0.489523
Rmax	GBLUP	MTA_SNPs	0.686085
Rmax	BL	All_SNPs	0.350976
Rmax	BL	MTA_SNPs	0.634587
Rmax	BC	All_SNPs	0.486589
Rmax	BC	MTA_SNPs	0.65762
Rmax	RKHS	All_SNPs	0.502774
Rmax	RKHS	MTA_SNPs	0.678384
Rmax	RF	All_SNPs	0.507322
Rmax	RF	MTA_SNPs	0.64115
GBLUP: Genomic Best Linear Unbiased Prediction, BL: Bayesian LASSO, BC: Bayes C, RKHS: Reproducing Kernel Hilbert Space, RF: Random Forest

## Sheet: Sheet7
Table S7 Significant markers and their contributions in the polygenic score (PGS) models for quality trait
Trait	MTAs	SNP	Effect	Weight (%)	R² (%)	Model Size	Capture (%)	Threshold (P-value)	Rank in Model
GPC	MTA30	AX-109915920	0.196864	0.00204888	0.364786	557	0.010772	0.044	152
	MTA33	AX-110969224	0.201162	0.00209361					137
	MTA39	AX-111103112	-0.179625	0.00186946					184
	MTA79	AX-110010904	-0.248488	0.00258616					58
	MTA89	AX-109401568	-0.285177	0.002968					33
	MTA93	AX-110021101	-0.382877	0.00398482					6
TW	MTA3	AX-111736828	1.61068	0.00388739	0.413654	379	0.0105541	0.03	35
	MTA27	AX-110982987	3.5514	0.00857133					1
	MTA65	AX-110980979	-2.31985	0.00559898					10
	MTA68	AX-110467026	-1.15019	0.00277599					116
WGC	MTA82	AX-110669742	0.395582	0.125812	0.274645	4	0.75	0.001	3
	MTA87	AX-109644949	-1.20889	0.384478					1
	MTA92	AX-110919886	-1.17033	0.372213					2
MC	MTA29	AX-109439433	-0.0600081	0.00166492	0.41356	1108	0.00270758	0.116	54
	MTA38	AX-111068094	0.0624125	0.00173164					37
	MTA63	AX-169335107	0.0562226	0.0015599					73
WA	MTA11	AX-109290352	0.679767	0.0102633	0.415229	88	0.227273	0.003	44
	MTA12	AX-111853381	0.83944	0.0126741					70
	MTA16	AX-110366150	-1.25839	0.0189995					82
	MTA19	AX-111071301	0.695369	0.0104989					47
	MTA20	AX-111656989	-0.724409	0.0109374					52
	MTA23	AX-111088504	0.785364	0.0118577					64
	MTA25	AX-111116868	-0.628478	0.00948896					38
	MTA43	AX-110505751	-0.799385	0.0120694					67
	MTA49	AX-110493720	-0.606632	0.00915912					33
	MTA50	AX-111807575	0.60761	0.0091739					34
	MTA72	AX-108814349	-1.59795	0.0241264					87
	MTA74	AX-110186027	-0.785715	0.011863					65
	MTA76	AX-109586392	-0.761559	0.0114983					59
	MTA83	AX-110351501	-0.68376	0.0103236					45
	MTA84	AX-109891051	-0.59967	0.00905401					29
	MTA86	AX-111081645	-1.27507	0.0192514					84
	MTA95	AX-111190466	-0.635062	0.00958837					39
	MTA96	AX-111060003	0.571965	0.0086357					20
	MTA97	AX-110041647	-0.57845	0.00873363					22
	MTA101	AX-111085399	1.12267	0.0169505					77
DST	MTA21	AX-109330112	0.209477	0.0482866	0.48006	22	0.363636	0.001	7
	MTA40	AX-110441678	-0.16724	0.0385505					13
	MTA45	AX-109989063	0.145472	0.0335328					18
	MTA52	AX-109403595	0.186215	0.0429244					10
	MTA57	AX-110956311	0.138972	0.0320344					19
	MTA62	AX-169337612	-0.226705	0.0522579					5
	MTA69	AX-110604539	0.172387	0.0397369					12
	MTA100	AX-110888456	0.14913	0.034376					17
DDT	MTA9	AX-111550166	-0.131647	0.0346213	0.430479	24	0.333333	0.001	14
	MTA10	AX-111548801	0.117518	0.0309055					22
	MTA13	AX-110466112	-0.133048	0.0349896					13
	MTA34	AX-110512340	-0.359673	0.0945887					1
	MTA71	AX-110551395	-0.138641	0.0364606					10
	MTA77	AX-110039178	-0.12791	0.0336384					17
	MTA81	AX-109478902	-0.138471	0.0364158					11
	MTA90	AX-111574093	0.215566	0.0566907					4
EXT	MTA47	AX-108948265	-2.05015	0.000997121	0.377053	1432	0.00488827	0.027	198
	MTA59	AX-109310208	3.83934	0.00186732					10
	MTA64	AX-111506476	-1.84655	0.000898096					280
	MTA66	AX-109363198	1.58432	0.000770556					417
	MTA89	AX-109401568	-4.00813	0.00194942					6
	MTA94	AX-111635644	-1.90426	0.000926166					255
	MTA102	AX-109399434	-3.49055	0.00169768					19
EA	MTA7	AX-111572690	6.88848	0.0133867	0.405207	231	0.00865801	0.162	1
	MTA46	AX-110920832	3.26409	0.00634325					27
Rmax	MTA13	AX-110466112	-7.778	0.0217628	0.397439	29	0.172414	0.002	28
	MTA55	AX-111593919	12.0149	0.0336177					11
	MTA70	AX-111582953	11.4598	0.0320645					12
	MTA81	AX-109478902	-8.00417	0.0223956					26
	MTA86	AX-111081645	-14.8398	0.0415217					8
Weight (%) = ( |β| / Σ|β| ) × 100%
β = Effect size of the SNP from the PRS optimal model
Σ|β| = Sum of absolute effect sizes of all SNPs in the optimal model for that trait
R² (%): Model explanation rate for each trait (shown only once per trait)

## Sheet: Sheet8
Table S8 Initial QTL information collected from the 18 individual mapping populations and references
Parents	Population size	Population type	QTL number	LOD score	R2	Trait	Reference
UC1113×Kofa	93	RIL	4	3	6-18	GPC、WGC	(Zhang et al. 2008)
Langdon×G18-16	152	RIL	10	3.2-10.4	10	GPC	(Peleg et al. 2009)
Ning7840×Clark	132	RIL	10	3.1-6.7	7.6-10.2	GPC、TW	(Sun et al. 2010)
Huapei 3×Yumai 57	323	DH	8	3	10	GPC、FPC	(Zhao et al. 2010)
Marius×Cajeme71	79	RIL	20	2.5-6.1	7-29	ST、MX、MT、DT、EXT、DS	(Kerfal et al. 2010)
Lang×CSCR6	82	RIL	11	3	4-14.7	GH、FN、GPC、GC、SDS	(Ma et al. 2012)
Huapei 3×Yumai 57	168	DH	4	3	2-18.4	SV	(Deng et al. 2013)
CO940610×Platte	185	DH	9	2.93-6.63	5.6-8.8	GPC、TW	(El-Feki et al. 2013)
Attila×CDC Go	171	RIL	5	3.7-5	8-15.8	GPC	(Asif et al. 2015)
WCB414×WCB617	163	RIL	11	3.4-9.22	4.7-10.5	GPC	(Echeverry-Solarte et al. 2015)
GC8901×NM1	290	RIL	36	2.5-16.5	3.59-22.44	GI、RGC、WGC、SV、FPC	(Deng et al. 2015)
Shannong 01-35×Gaocheng 9411	182	RIL	51	2.77-13.6	3.52-48.33	GI、DGC、WGC、SV、GPC、FPC	(Liu et al. 2017)
Duilio×Avonlea	134	RIL	7	3.6-5	10-17	GPC	(Marcotuli et al. 2017)
Glenn×Traverse	127	RIL	18	3.61-10.37	5.94-20.18	GPC	(Naraghi et al. 2019)
WL711×C306	206	RIL	31	2.9-7.8	7.9-16.8	GPC、SDS、TW、SD、WGC、DGC、FWA、DDT、DST、BDT、KH	(Goel et al. 2019)
WH 542 × Synthetic derivative	163	RIL	10	2.52-5.72	4.73-11.39	GPC	(Krishnappa et al. 2021)
ZKM138×KCM2	152	RIL	18	3.48-12.07	5.49-35.56	GPW、GSW、GWW、SC、MC、GH、ABS、TW	(Fan et al. 2022)
Gaocheng8901/Zhoumai16	176	RIL	26	2.82-14.64	2.52-21.88	DST	(Sun et al. 2025)
RIL, Recombinant Inbred Line population; DH, Double-haploid population
References
Asif M, Yang R-C, Navabi A, Iqbal M, Kamran A, Lara EP, Randhawa H, Pozniak C, Spaner D (2015) Mapping QTL, Selection Differentials, and the Effect of Rht-B1 under Organic and Conventionally Managed Systems in the Attila × CDC Go Spring Wheat Mapping Population. Crop Science 55:1129-1142. http://dx.doi.org/https://doi.org/10.2135/cropsci2014.01.0080
Deng Z-y, Zhao L, Liu B, Zhang K-p, Chen J-s, Qu H-l, Sun C-l, Zhang Y-x, Tian J-c (2013) Conditional QTL Mapping of Sedimentation Volume on Seven Quality Traits in Common Wheat. Journal of Integrative Agriculture 12:2125-2133. http://dx.doi.org/10.1016/s2095-3119(13)60352-4
Deng Z, Tian J, Chen F, Li W, Zheng F, Chen J, Shi C, Sun C, Wang S, Zhang Y (2015) Genetic dissection on wheat flour quality traits in two related populations. Euphytica 203:221-235. http://dx.doi.org/10.1007/s10681-014-1318-7
Echeverry-Solarte M, Kumar A, Kianian S, Simsek S, Alamri MS, Mantovani EE, McClean PE, Deckard EL, Elias E, Schatz B, Xu SS, Mergoum M (2015) New QTL alleles for quality-related traits in spring wheat revealed by RIL population derived from supernumerary × non-supernumerary spikelet genotypes. Theoretical and Applied Genetics 128:893-912. http://dx.doi.org/10.1007/s00122-015-2478-0
El-Feki WM, Byrne PF, Reid SD, Lapitan NLV, Haley SD (2013) Quantitative Trait Locus Mapping for End-Use Quality Traits in Hard Winter Wheat Under Contrasting Soil Moisture Levels. Crop Science 53:1953-1967. http://dx.doi.org/https://doi.org/10.2135/cropsci2012.12.0674
Fan X, Liu X, Feng B, Zhou Q, Deng G, Long H, Cao J, Guo S, Ji G, Xu Z, Wang T (2022) Construction of a novel Wheat 55 K SNP array-derived genetic map and its utilization in QTL mapping for grain yield and quality related traits. Frontiers in Genetics Volume 13 - 2022http://dx.doi.org/10.3389/fgene.2022.978880
Goel S, Singh K, Singh B, Grewal S, Dwivedi N, Alqarawi AA, Abd_Allah EF, Ahmad P, Singh NK (2019) Analysis of genetic control and QTL mapping of essential wheat grain quality traits in a recombinant inbred population. PLOS ONE 14:e0200669. http://dx.doi.org/10.1371/journal.pone.0200669
Kerfal S, Giraldo P, Rodríguez-Quijano M, Vázquez JF, Adams K, Lukow OM, Röder MS, Somers DJ, Carrillo JM (2010) Mapping quantitative trait loci (QTLs) associated with dough quality in a soft×hard bread wheat progeny. Journal of Cereal Science 52:46-52. http://dx.doi.org/https://doi.org/10.1016/j.jcs.2010.03.001
Krishnappa G, Rathan ND, Sehgal D, Ahlawat AK, Singh SK, Singh SK, Shukla RB, Jaiswal JP, Solanki IS, Singh GP, Singh AM (2021) Identification of Novel Genomic Regions for Biofortification Traits Using an SNP Marker-Enriched Linkage Map in Wheat (Triticum aestivum L.). Frontiers in Nutrition Volume 8 - 2021http://dx.doi.org/10.3389/fnut.2021.669444
Liu T-t, Liu K, Wang F-f, Zhang Y, Li Q-f, Zhang K-r, Xie C-p, Tian J-c, Chen J-s (2017) Conditional and unconditional QTLs mapping of gluten strength in common wheat (Triticum aestivum L.). Journal of Integrative Agriculture 16:2145-2155. http://dx.doi.org/https://doi.org/10.1016/S2095-3119(16)61564-2
Ma J, Zhang C-y, Yan G-j, Liu C-j (2012) Identification of QTLs Conferring Agronomic and Quality Traits in Hexaploid Wheat. Journal of Integrative Agriculture 11:1399-1408. http://dx.doi.org/https://doi.org/10.1016/S2095-3119(12)60139-7
Marcotuli I, Gadaleta A, Mangini G, Signorile AM, Zacheo SA, Blanco A, Simeone R, Colasuonno P (2017) Development of a High-Density SNP-Based Linkage Map and Detection of QTL for β-Glucans, Protein Content, Grain Yield per Spike and Heading Time in Durum Wheat. International Journal of Molecular Sciences 18:1329.
Naraghi SM, Simsek S, Kumar A, Al Rabbi SMH, Alamri MS, Elias EM, Mergoum M (2019) Deciphering the Genetics of Major End-Use Quality Traits in Wheat. G3 Genes|Genomes|Genetics 9:1405-1427. http://dx.doi.org/10.1534/g3.119.400050
Peleg Z, Cakmak I, Ozturk L, Yazici A, Jun Y, Budak H, Korol AB, Fahima T, Saranga Y (2009) Quantitative trait loci conferring grain mineral nutrient concentrations in durum wheat × wild emmer wheat RIL population. Theoretical and Applied Genetics 119:353-369. http://dx.doi.org/10.1007/s00122-009-1044-z
Sun C, Jing Z, Chen X, Chen J, Shang Q, Jin H, Jia J, Ren Y, Zhao L, Gao L, He Z, Chen F (2025) Reconciliation of wheat 660K and 90K SNP arrays and their utilization in dough rheological properties of bread wheat. Journal of Advanced Research 77:1-13. http://dx.doi.org/10.1016/j.jare.2025.01.011
Sun X, Marza F, Ma H, Carver BF, Bai G (2010) Mapping quantitative trait loci for quality factors in an inter-class cross of US and Chinese wheat. Theoretical and Applied Genetics 120:1041-1051. http://dx.doi.org/10.1007/s00122-009-1232-x
Zhang W, Chao S, Manthey F, Chicaiza O, Brevis JC, Echenique V, Dubcovsky J (2008) QTL analysis of pasta quality using a composite microsatellite and SNP map of durum wheat. Theoretical and Applied Genetics 117:1361-1377. http://dx.doi.org/10.1007/s00122-008-0869-1
Zhao L, Zhang K-P, Liu B, Deng Z-y, Qu H-L, Tian J-C (2010) A comparison of grain protein content QTLs and flour protein content QTLs across environments in cultivated wheat. Euphytica 174:325-335. http://dx.doi.org/10.1007/s10681-009-0109-z

## Sheet: Sheet9
Table S9 Meta-analysis of QTL for the quality traits in wheat.
ID	MQTL	Position (CM)	Confidenceinterval	Flanking marker	Physicial position (IWGSC RefSeqv1.0)	MTA
1	MQTL1A.1	13.37	10.29-16.45	wPt-729972—wPt-667458	9.3-10.4
2	MQTL1A.2	87.67	86.44-88.9	AX-94444426—AX-94386938	537.9-541.9
3	MQTL1A.3	103.63	102.63-104.62	Tdurum_contig26035_231—Kukri_c5715_141	11.5-11.8
4	MQTL1A.4	127.53	126.47-128.6	Excalibur_c20777_428—BobWhite_c18861_438	14.1-14.6
5	MQTL1B.1	5.65	0.32-9.84	AX-94678644—wPt-3824	3.6-7.2
6	MQTL1B.2	56.43	54.86-58.96	Tdurum_contig403_122—wPt-4326	22.2-32.0	MTA7
7	MQTL1B.3	85.89	83.41-89.78	wPt-8168—wPt-0260	43.9-88.7
8	MQTL1B.4	108.96	107.17-110.76	AX-94564902—AX-94400174	646.1-649.3
9	MQTL1B.5	170.38	168.61-172.15	AX-94656870—AX-94460154	674.4-677
10	MQTL1D.1	76.96	74.83-79.08	AX-94401159—AX-94860748	407.8-412.2
11	MQTL1D.2	121.09	120.51-121.67	wPt-4141—AX-95109932	468.4-478.2
12	MQTL1D.3	139.05	137.05-139.05	AX-94478285—AX-94521634	481.6-484.1
13	MQTL1D.4	227.39	225.98-228.81	BS00020363_51—RAC875_c28211_403	459.8-470.4
14	MQTL2A.1	23.7	22.07-25.34	wPt-744782—wmc602	18.6-38.7	MTA13
15	MQTL2A.2	30.82	30.12-31.51	gwm448—wmc63	154.4-200.1
16	MQTL2A.3	50.36	49.46-51.25	AX-94399873—AX-94768469	40.8-57.5
17	MQTL2A.4	100.89	79.49-122.29	AX-94444379—WMC658	686.8-771.1
18	MQTL2B.1	3.2	0.54-5.86	wmc764—gpw2039	8-17.9
19	MQTL2B.2	27.06	25.07-29.04	wPt-5374—gpw1099	41.4-44
20	MQTL2B.3	41.23	40.53-42.13	AX-94540964—wPt-2600	22.5-66.7
21	MQTL2B.4	55.14	53.16-57.12	AX-94437870—wPt-1064	24.8-92.1
22	MQTL2D.1	18.53	16.52-20.54	GDM5—GWM261	15.5-19.6
23	MQTL2D.2	62.95	58.47-67.43	D_F5MV3MU01EAJ4J_240—wsnp_BG275030D_Ta_2_2	30.2-35.5	MTA22
24	MQTL2D.3	100.22	89.22-110.22	D_GBB4FNX01DJHXL_88—D_contig05331_658	50.9-73.8	MTA23-25
25	MQTL2D.4	321.05	319.55-321.55	Excalibur_c14639_536—D_F5MV3MU01EJU6H_88	644.7-649.1
26	MQTL3A.1	7.43	1.43-13.83	AX-94654362—wPt-1655	12.5-16.5
27	MQTL3A.2	32.57	26.96-38.19	barc12—cdo395	15.4-32.7
28	MQTL3A.3	45.9	39.33-52.47	WMS5—AX-94499616	552.6-634.9
29	MQTL3A.4	93.39	87.79-93.89	AX-94479717—AX-94425282	719.3-724.6
30	MQTL3B.1	20.05	19.11-20.98	barc87—wmc43	14.3-42.7	MTA41-46
31	MQTL3B.2	45.51	45.11-45.91	BS00058861_51—BS00087757_51	5.6-6.2
32	MQTL3B.3	52.25	51.89-52.6	wPt-0327—wPt-4608	237.5-411.2
33	MQTL3B.4	129.55	127.34-131.76	AX-95185293—AX-94394857	29.7-39.9
34	MQTL3D	1.68	0.27-3.65	RFL_Contig3455_507—wPt-740710	5.6-17.2
35	MQTL4A.1	6.01	0.01-12.01	tplb0043j11_1190—gpw2302	0-70.6
36	MQTL4A.2	87.07	84.9-89.23	wPt-8841—wPt-3655	672.2-687.5
37	MQTL4A.3	115.45	112.45-118.44	wPt-4645—wPt-2983	699.5-720.7	MTA55
38	MQTL4A.4	415.05	402.41-427.7	AX-94606279—Excalibur_c7034_234	521.5-660.9	MTA54
39	MQTL4B.1	8.52	7.18-9.85	RFL_Contig4708_1477—cdo795	6.1-75.2	MTA56-58
40	MQTL4B.2	30.83	30.34-31.32	gwm368—wPt-6123	59.6-101.6
41	MQTL4B.3	94.85	94.35-95.35	Tdurum_contig94184_313—Tdurum_contig97386_207	11.3-13	MTA58
42	MQTL4B.4	290.92	285.09-296.76	BS00094252_51—BS00023204_51	651.9-656.1
43	MQTL4D.1	44.31	40.49-48.13	BS00099053_51—Ex_c4096_1540	3.6-6.5	MTA60-61
44	MQTL4D.2	51.33	49.83-52.83	D_GDRF1KQ01BONOD_264—Excalibur_c91022_193	6.4-7.6	MTA60-61
45	MQTL4D.3	201.54	197.04-202.04	D_F5XZDLF01DBHUA_161—Kukri_c40437_66	496.6-497.6
46	MQTL5A.1	11.8	0.0-26.9	Xbarc10—wPt-666142	2.1-6.4
47	MQTL5A.2	36.06	31.76-40.35	AX-94410603—AX-94406590	5.7-8
48	MQTL5A.3	78.02	74.2-81.85	AX-94535336—AX-95155315	30.4-69.8
49	MQTL5A.4	165.01	163.09-166.94	AX-94399337—AX-94386617	613.5-658.8
50	MQTL5B.1	0	0.0-7.5	BS00032003_51—wPt-1302	2.5-8.3
51	MQTL5B.2	23.74	22.06-25.42	wPt-0819—wPt-5737	19.5-47.3
52	MQTL5B.3	148.18	142.91-153.44	AX-94590691—BS00035899_51	313-421.6
53	MQTL5B.4	429.97	418.6-441.34	BobWhite_c2767_72—Excalibur_c22518_1683	657.7-664.6
54	MQTL5D.1	0.44	0.35-1.24	wmc233—barc130	5.8-6.4
55	MQTL5D.2	50.89	50.6-51.18	gwm583—gwm182	408.6-439.2
56	MQTL5D.3	84.5	83.03-85.97	wmc357—gdm63	499.6-517.4
57	MQTL5D.4	548.89	535.39-548.89	Excalibur_c37696_268—D_GCE8AKX01B34J2_144	561.8-563.9
58	MQTL6A.1	5.55	3.7-7.41	BobWhite_c30632_331—wPt-741630	0-2.2
59	MQTL6A.2	30.34	25.67-35.01	wPt-4681—AX-94634533	23.3-25.7	MTA79
60	MQTL6A.3	61.99	56.43-67.55	RAC875_c22627_315—AX-94547098	10.5-53.9	MTA79
61	MQTL6A.4	113.65	112.67-114.64	Tdurum_contig11414_310—wsnp_Ex_c31149_39975724	25.6-32.6	MTA79
62	MQTL6B.1	20.25	14.97-25.52	wPt-2297—gdm113	36.1-77.1
63	MQTL6B.2	56.87	42.71-73.21	gwm70—AX-94452318	173.8-657
64	MQTL6B.3	104.6	99.42-109.78	AX-94405552—AX-94614625	686.8-690.7
65	MQTL6B.4	160.89	149.26-172.53	RFL_Contig5294_1413—Kukri_c33668_877	48.5-119.5
66	MQTL6D.1	23.46	18.96-27.97	barc183—cfd75	4.9-14.2
67	MQTL6D.2	81.46	78.2-84.73	D_GA8KES401DTOBP_77—AX-95253788	14.5-87	MTA82
68	MQTL7A.1	13.65	12.96-14.34	wPt-731291—gwm471	5.6-14.6
69	MQTL7A.2	24	23.55-24.45	wmc168—gwm60	33.6-54.9
70	MQTL7A.3	121.72	120.26-123.18	BobWhite_c8796_753—RAC875_c48202_231	8.2-12.1
71	MQTL7A.4	234.53	228.03-243.03	RAC875_c50665_202—RAC875_c26866_239	47.4-51.3
72	MQTL7B.1	7.7	7.21-9.21	wmc323—wPt-7318	5.9-16.1	MTA95
73	MQTL7B.2	24.09	12.59-35.59	Excalibur_c50044_749—gpw2119	6.1-92.5	MTA95
74	MQTL7B.3	60.23	56.3-64.17	barc176—barc278	557-595
75	MQTL7B.4	117.12	98.76-140.26	AX-94909821—wPt-5690	610.7-743.6	MTA97-99
76	MQTL7D.1	4.52	0.0-12.72	Excalibur_c1209_983—wPt-744300	4.5-27.2
77	MQTL7D.2	34.55	32.11-37.0	wPt-7500—wPt-1205	17.6-40.1	MTA100
78	MQTL7D.3	113.9	111.05-116.75	mwg975—Xbarc111	477.8-587.9
